# 1 **The second messenger c-di-AMP controls natural competence via** 2 **ComFB signaling protein**

3 Sherihan Samir<sup>1,4,§</sup>, Sofia Doello<sup>1,§</sup>, Erik Zimmer<sup>1</sup>, Michael Haffner<sup>1</sup>, Andreas M. Enkerlin<sup>2</sup>, Teresa  
4 Müller<sup>1</sup>, Lisa Dengler<sup>1</sup>, Stilianos P. Lambidis<sup>1</sup>, Shamphavi Sivabalasarma<sup>3,5</sup>, Sonja-Verena Albers<sup>3,6</sup>,  
5 Khaled A. Selim<sup>1,2,6,\*</sup>

6 <sup>1</sup> Interfaculty Institute of Microbiology and Infection Medicine, Organismic Interactions Department, Cluster of  
7 Excellence “Controlling Microbes to Fight Infections”, Tübingen University, 72076 Tübingen, Germany

8 <sup>2</sup> Microbiology/ Molecular Physiology of Prokaryotes, Institute of Biology, University of Freiburg, Schänzlestraße  
9 1, 79104 Freiburg, Germany

10 <sup>3</sup> Molecular Biology of Archaea, Institute of Biology, University of Freiburg, Freiburg, Germany

11 <sup>4</sup> Microbiology Department, Faculty of Science, Ain Shams University, Cairo, Egypt

12 <sup>5</sup> Spemann Graduate School of Biology and Medicine, University of Freiburg, 79104 Freiburg, Germany

13 <sup>6</sup> Signalling Research Centres BIOSS and/or CIBBS, Faculty of Biology, Freiburg University, Freiburg, Germany

14 <sup>§</sup> These authors contributed equally to this work

15 \* **Correspondence: Khaled A. Selim ([khaled.selim@biologie.uni-freiburg.de](mailto:khaled.selim@biologie.uni-freiburg.de))**

16

17 **Natural competence requires a contractile pilus system. Here, we provide evidence that the pilus**  
18 **biogenesis and natural competence in cyanobacteria are regulated by the second messenger c-di-**  
19 **AMP. Furthermore, we show that the ComFB signaling protein is a novel c-di-AMP-receptor**  
20 **protein, widespread in bacterial phyla, and required for DNA uptake.**

21

22 Second messengers are small molecules involved in regulating many processes in all kinds of organisms  
23 (Yoon & Waters 2021). Cyclic di-AMP is one of the recently discovered di-nucleotide-type second  
24 messengers only present in prokaryotes (Stülke & Krüger 2020; He et al. 2020; Yin et al. 2020;  
25 Mantovani et al. 2023a). Its functions have been mainly studied in firmicutes, where it plays an  
26 important role in osmo-adaptation by controlling potassium homeostasis and influencing transcription  
27 of genes related to osmosis and cell wall metabolism (Stülke & Krüger 2020; He et al. 2020; Yin et al.  
28 2020; Herzberg et al. 2023; Nelson et al. 2013; Ren & Patel 2014). In cyanobacteria, c-di-AMP seems  
29 to control additional processes, including the diurnal metabolism via its binding to the carbon control  
30 protein SbtB to regulate glycogen metabolism (Rubin et al. 2018; Selim et al. 2021a). Although  
31 important roles for c-di-AMP have been acknowledged since its discovery, recent studies suggest  
32 broader regulatory impacts of c-di-AMP signaling with further functions yet to be elucidated  
33 (Mantovani et al. 2022; Haffner et al. 2023b). For instance, a role for c-di-AMP in controlling natural  
34 competence has been speculated in *Streptococcus pneumoniae*, although the molecular mechanism  
35 remained elusive (Zarella et al. 2020). In this study, we aimed to investigate the involvement of c-di-  
36 AMP in natural competence.

37

38 Natural competence is a conserved mechanism of horizontal gene transfer that permits massive genetic  
39 variation and genomic plasticity via uptake of extracellular DNA, and it is the main cause of spreading  
40 antibiotic resistance and acquisition of virulence factors (Gibson & Venning 2023; Ellison et al. 2018).

41 This process involves a contractile pilus system and an assemblage of competence-accessory proteins  
42 (Taton et al. 2020; Ellison et al. 2018; Chen et al. 2020). In cyanobacteria, natural competence is under  
43 circadian clock control, with pili biogenesis occurring during the day phase and competence being  
44 induced with the onset of the night, when the circadian peaks (Taton et al. 2020). In the cyanobacterium  
45 *Synechocystis* sp. PCC 6803, the cellular levels of c-di-AMP and the transcription of its synthesizing  
46 di-adenylate cyclase gene (*dacA*), also follow a circadian rhythm: They decline during the night and  
47 increase sharply at the onset of the day (Selim et al. 2021a).

48  
49 To test the involvement of c-di-AMP in natural competence, we compared the ability of the wildtype  
50 (WT) *Synechocystis* strain and the c-di-AMP-free  $\Delta dacA$  mutant to take up DNA. Both strains were  
51 incubated with various extracellular DNA constructs containing a sequence that allows the insertion of  
52 a chloramphenicol resistance cassette via homologous recombination in a neutral site in the genome.  
53 The transformation efficiency for each strain was determined by analyzing the ability of these cells to  
54 grow on agar plates in the presence of chloramphenicol. The  $\Delta dacA$  mutant showed significantly lower  
55 transformation efficiency than the WT, implying an essential role of c-di-AMP in natural competence  
56 (Figs. 1A and S1). Introducing a plasmid containing the *dacA* gene under the control of the *PpetE*  
57 promoter into the  $\Delta dacA$  strain restored the transformation efficiency to WT levels. Introducing the  
58 same plasmid into the WT to generate a c-di-AMP overexpression strain (WT::*petE-dacA*) did not affect  
59 the transformation efficiency. These results indicate that the absence of c-di-AMP affects cyanobacterial  
60 natural competence negatively, whereas high c-di-AMP does not. A similar result (Fig. S1) was obtained  
61 using the c-di-AMP-null  $\Delta cdaA$  mutant of *Synechococcus elongatus* (Rubin et al. 2018), indicating that  
62 the c-di-AMP-dependent control of natural competence is a common trait among cyanobacteria.

63  
64 To gain insights into the molecular basis of c-di-AMP-dependent control of natural competence, we  
65 checked how the lack of this second messenger affects pilus biogenesis. Proteome analysis of the  $\Delta dacA$   
66 mutant compared to WT cells under day-night cycle, a condition triggering pili biogenesis and natural  
67 competence (Taton et al. 2020), revealed a strong downregulation of specific proteins involved in pilus  
68 biogenesis and DNA uptake in the  $\Delta dacA$  mutant (Haffner et al. 2023b). These changes were marked  
69 by a reduced abundance of PilT1 (Slr0161), PilM (Slr1274), PilN (Slr1275), PilO (Slr1276), and  
70 Sll0180 proteins (Table S1). The levels of the other pilus machinery proteins, including the extracellular  
71 pilin PilA1, were not significantly altered in the  $\Delta dacA$  mutant (Table S1). The assembly of a functional  
72 pilus requires two motor ATPases, PilB1 and PilT1. PilT1 is located at the pilus base and is required for  
73 retraction and depolymerization. Therefore, the *pilT1* mutant is nonmotile, hyperpilated and loses  
74 natural competence (Cengic et al. 2018; Bhaya et al. 2000; Okamoto & Ohmori 2002). The PilMNO  
75 proteins form the alignment complex, connecting the components of the pilus machinery in the inner  
76 and outer membranes by forming a ring-structure in the periplasm (Chang et al. 2016; Conradi et al.  
77 2020; Chen et al. 2020). Similarly, the *pilM*, *pilN* and *pilO* mutants are nonmotile and non-transformable  
78 (Yoshihara et al. 2001). Sll0180 is an accessory protein of TolC-system, needed for the glycosylation

79 of PilA1 and the secretion of the S-layer protein, and thereby the correct assembly of the pilus  
80 machinery (Gonçalves et al. 2018). The absence of functional PilA1 causes a non-transformable  
81 phenotype (Yoshihara et al. 2001). Notably, our transcriptome analysis showed a partial downregulation  
82 of *pilT1* and *slr0180*, while the *pilT2* gene (*slr1533*; Bhaya et al. 2000) was strongly downregulated in  
83  $\Delta dacA$  (Table S2; Mantovani et al. 2022). These findings explain why  $\Delta dacA$  cells lost their natural  
84 competence.

85  
86 The striking decrease of PilT1 levels in  $\Delta dacA$  suggested a strong defect in pilus assembly and  
87 retraction. To confirm this assumption, we examined negatively stained  $\Delta dacA$  and WT cells by  
88 transmission electron microscopy (TEM). While we could detect both thick and thin pili in the WT,  
89 only thick pili were obvious in  $\Delta dacA$  cells (Fig. S2). Additionally,  $\Delta dacA$  mutant showed a  
90 hyperpiliation phenotype in analogy to *pilT1* mutant (Cengic et al. 2018; Bhaya et al. 2000; Okamoto  
91 & Ohmori 2002). In addition, quantification of the major pilin PilA1 in the exoproteome of the  $\Delta dacA$   
92 mutant via immunodetection revealed an accumulation of PilA1 compared to the WT cells (Fig. 1B),  
93 consistent with the hyperpiliation phenotype of  $\Delta dacA$  cells. These findings clearly support the notion  
94 of a c-di-AMP-dependent control of pilus biogenesis and natural competence with dysregulation of  
95 various components of pilus machinery in  $\Delta dacA$  cells.

96  
97 The lack of nonretractable pili explains the inability of the  $\Delta dacA$  strain to take up DNA. Interestingly,  
98 the downregulation of the above-mentioned proteins was not detected in the  $\Delta sbtB$  mutant, which lacks  
99 the only known cyanobacterial c-di-AMP receptor (Table S3) (Selim et al. 2021a; Haffner et al. 2023b).  
100 Additionally,  $\Delta sbtB$  behaved like the WT in our natural competence assays (Figs. 1A and S1). These  
101 data suggested the involvement of an additional, yet unknown, c-di-AMP receptor, required for natural  
102 competence. To identify this new c-di-AMP receptor, cell extracts of *Synechocystis* cells grown under  
103 day-night cycles were incubated with immobilized c-di-AMP and bound proteins were identified by  
104 mass spectrometry (Figs. 1C and S3). The identification of several known c-di-AMP targets: SbtB, as  
105 well as the transporters TrkA, KrtA, MthK, MgtE and NhaS5, validated our pulldowns (Selim et al.  
106 2021a). Additionally, the Slr1970 protein was also enriched under both conditions. This protein  
107 possesses the competence factor B domain (domain PF10719 in the Pfam database) (Mistry et al. 2021)  
108 and therefore was annotated as ComFB in the NCBI's RefSeq database (Haft et al. 2023). Enrichment  
109 of ComFB correlated with the intracellular levels of c-di-AMP, where ComFB was 8 times more  
110 abundant in the day than in the night pulldown. This indicates that the abundance of ComFB follows  
111 the same pattern as the c-di-AMP synthesis with an increase during the day and a decrease at night  
112 (Selim et al. 2021a). ComFB is widespread among different bacterial phyla (Figs. 1D and S4), implying  
113 a fundamental role in cell physiology. In *Bacillus*, *comFB* forms an operon with *comFA* and *comFC*,  
114 which are known to be involved in DNA uptake (Sysoeva et al. 2015; Hahn et al 2019). In *Synechocystis*  
115 and other cyanobacteria, *comFB* forms an operon with *hfq*, which is also involved in DNA uptake and

116 motility (Fig. S5) (Dienst et al. 2008; Schuergers et al. 2014; Oeser et al. 2021; Conradi et al. 2020),  
117 strongly suggesting a potential function of ComFB in natural competence.  
118

119 To validate ComFB as a novel c-di-AMP-binding protein, we used several biophysical methods after  
120 purifying recombinant His<sub>8</sub>-ComFB protein. Size exclusion chromatography coupled to multiangle  
121 light scattering (SEC-MALS) showed a species of ~ 40.5 kDa (Fig. S6), indicating that the 20.4 kDa  
122 ComFB protein is dimer in solution. Using isothermal titration calorimetry (ITC), we measured the  
123 binding affinity of ComFB to c-di-AMP. The c-di-AMP binds exothermically to ComFB with high  
124 affinity in the low micromolar range of a  $K_D \sim 2.6 \pm 0.11 \mu\text{M}$  (Figs. 1E and S6), indicating that ComFB  
125 binds c-di-AMP specifically. This result was confirmed using nano differential scanning fluorimetry  
126 (nanoDSF) and thermal shift assays (Figs. S7 and S8), where c-di-AMP thermally stabilized ComFB  
127 significantly in a concentration-dependent manner. Moreover, we performed DRaCALA assays  
128 (Roelofs et al. 2011) using radiolabeled [<sup>32</sup>P]c-di-AMP to test further the specificity of c-di-AMP-  
129 binding to ComFB in competition with various unlabeled nucleotides. DRaCALA titration assays  
130 revealed strong binding of [<sup>32</sup>P]c-di-AMP to ComFB with a  $K_D$  value of  $3.6 \pm 5.4 \mu\text{M}$  (Fig. 1F),  
131 comparable to that obtained by ITC. In the competition assays, the unlabeled c-di-AMP competed with  
132 [<sup>32</sup>P]c-di-AMP for binding to ComFB, but that was not the case for ATP, ADP, and cAMP, confirming  
133 that c-di-AMP binding to ComFB is specific. However, this assay revealed that ComFB could  
134 additionally bind c-di-GMP, as c-di-GMP efficiently competed with [<sup>32</sup>P]c-di-AMP (Fig. 1G).  
135 Remarkably, a recent study showed that the ComFB homolog in the multicellular cyanobacterium  
136 *Nostoc*, named CdgR, controls cell size by binding c-di-GMP (Zeng et al. 2023). In fact, the filamentous  
137 cyanobacterium *Nostoc* sp. PCC7120 is regarded as being not naturally competent (Schirmacher et al.  
138 2020), implying that ComFB or CdgR might play different roles in multicellularity lifestyle.  
139

140 To ascertain whether c-di-AMP binding to CdgR is of physiological relevance, we performed a  
141 pulldown assay with immobilized c-di-AMP as described above but using cell extracts from *Nostoc*  
142 (Fig. S3). Indeed, we identified the ComFB homolog (CdgR; Alr3277) as one of the enriched proteins  
143 along with other known c-di-AMP receptor proteins. This result further confirms that both ComFB and  
144 CdgR specifically bind both cyclic di-nucleotides in both organisms. The existence of a crosstalk  
145 between c-di-AMP and c-di-GMP on ComFB awaits, however, further investigation. Crosstalk between  
146 second messenger nucleotides is perhaps a more common phenomenon than so far realized. Recently,  
147 it was found that the second messengers c-di-GMP and (p)ppGpp reciprocally control *Caulobacter*  
148 *crescentus* growth by competitive binding to a metabolic switch protein, SmbA (Shyp et al. 2021). SbtB  
149 plays a similar role in cyanobacterial physiology and binds both cAMP and c-di-AMP (Selim et al.  
150 2018, 2021a, 2023; Forchhammer et al. 2022). Likewise, the mycobacterial transcription factor DarR,  
151 which is regulated by c-di-AMP-binding, was found to be regulated as well through cAMP-binding  
152 (Schumacher et al. 2023). Additionally, crosstalk between cyclic guanosine and adenosine second  
153 messengers is also known, as the CRP-Fnr transcription factors are known to bind both cAMP and

154 cGMP, being only active in the cAMP-bound form in *E. coli*, while both cyclic nucleotides mediate the  
155 CRP activation in *Sinorhizobium meliloti* (Krol et al. 2023; Werel et al. 2023). Furthermore, both of  
156 cAMP and cGMP were found also to bind and modulate the activity of the AphA phosphatase in *E. coli*  
157 and *Haemophilus influenzae* (Kronborg & Zhang 2023).

158

159 To clarify if ComFB plays a role in natural competence, we created a  $\Delta slr1970$  deletion mutant  
160 ( $\Delta comFB$ ; Fig. S9) and tested its natural competence ability by taking up DNA as described above (Fig.  
161 1H). Like  $\Delta dacA$ ,  $\Delta comFB$  showed reduced transformation efficiency as compared to the WT and  $\Delta sbtB$   
162 cells. Complementation of  $\Delta comFB$  mutant with *comFB* gene under a *PpetE* promoter restored the WT  
163 competence phenotype (Fig. 1H). Interestingly, no impairment in DNA uptake was observed for  $\Delta sbtB$ ,  
164 which lacks another c-di-AMP receptor protein and showed a similar transformation rate to the WT  
165 (Figs. S1). These findings further support that natural competence depends on c-di-AMP signaling and  
166 is controlled specifically by a pathway that involves ComFB as a c-di-AMP receptor protein, while  
167 other c-di-AMP targets are not involved in this process. Notably, in contrast to  $\Delta sbtB$  (Selim et al.  
168 2021a), the  $\Delta comFB$  mutant did not show any impairment under diurnal growth or prolonged dark  
169 incubation (Fig. S10), supporting the notion that c-di-AMP plays different signaling functions through  
170 binding to different cellular receptors.

171

172 To rule out that the transformation deficiency observed in  $\Delta dacA$  mutant (Fig. 1A) is due to a  
173 downstream effect on the intracellular c-di-GMP content, which is known to regulate motility-related  
174 functions (Mantovani et al. 2023a; Enomoto et al. 2023), we measured the c-di-GMP levels in  $\Delta dacA$   
175 during the day and the night phases (Fig. S11). The c-di-GMP levels were comparable in both strains  
176 within the light/dark phases, thus confirming that DNA uptake is influenced by c-di-AMP specifically.

177

178 In conclusion, our results show that the regulation of pili biogenesis and natural competence is a new  
179 unexplored role of c-di-AMP, which requires the receptor protein ComFB. In a broader context, natural  
180 competence is a primary mode of horizontal gene transfer, which plays an important role in spreading  
181 multidrug resistance. It would therefore be highly interesting to determine whether the influence of c-  
182 di-AMP and ComFB signaling in DNA uptake extends to other bacteria, especially those of clinical  
183 relevance. Collectively, we identified ComFB as a novel widespread c-di-NMP-receptor protein, which  
184 turned out to be a pivotal competence-accessory protein, at least in cyanobacteria, likely regulating the  
185 pili biogenesis at transcriptional level by an as-yet unknown mechanism.

186

## 187 **Materials and Methods**

188 **Protein production and purification:** All the plasmids and primers used in this study are listed in (Table S4).  
189 The *slr1970* (encoding ComFB) and *slr1513* (encoding SbtB) from *Synechocystis* sp. PCC 6803 were cloned into  
190 the pET-28a vector with Gibson assembly, thereby incorporating a C-terminal His<sub>8</sub>-tag. Positive clones were  
191 selected on 50 µg/mL kanamycin agar plates. The expression and purifications of His<sub>8</sub>-ComFB, His<sub>6</sub>-DisA and  
192 His<sub>8</sub>-SbtB proteins were achieved as described previously (Selim et al. 2019, 2021b). The proteins were

193 recombinantly produced in *E. coli* strain LEMO21 (DE3) by overnight induction at 20 °C using 0.5 mM IPTG.  
194 Cells were lysed by sonication and the soluble proteins (ComFB, DisA or SbtB) were purified by immobilized  
195 metal affinity chromatography (IMAC) using Ni<sup>2+</sup>-Sepharose resin (cytiva™), followed by size exclusion  
196 chromatography (SEC) using a Superdex 200 Increase 10/300 GL column (GE HealthCare). Protein purity was  
197 assessed by Coomassie-stained SDS-PAGE, and protein concentrations were determined using Bradford assay.  
198 Analytical SEC coupled to multi-angle light scattering (SEC-MALS) was conducted as described previously to  
199 calculate the molar mass of ComFB protein, whereas SbtB was used as a control (Selim et al. 2019, 2020; Walter  
200 et al. 2019).

201  
202 **Synthesis of [<sup>32</sup>P]c-di-AMP:** The pGP2563 plasmid (pET19b-based; kindly provided by Jörg Stülke), expressing  
203 an active di-adenylate cyclase His<sub>6</sub>-DisA from *Bacillus subtilis* (Mehne et al. 2013), was used to express and  
204 purify DisA. Twenty μM or 50 μM DisA were incubated in DisA reaction buffer (40 mM Tris/HCl [pH 7.5], 100  
205 mM NaCl and 10 mM MgCl<sub>2</sub>) with 1 mM ATP at 30 °C overnight with 300 rpm shaking. Samples were centrifuged  
206 for 10 min at 14.000 rpm to remove precipitated protein. Then, the supernatant was filtered through Amicon®  
207 Ultra – 0.5 mL 10-kDa cutoff centrifugal filters (Merck KgaA; Darmstadt, Germany). To test the enzymatic  
208 efficiency of DisA before synthesizing [<sup>32</sup>P]c-di-AMP, DisA was incubated with unlabeled ATP and 15 μl of the  
209 reaction product was analysed by thin layer chromatography (TLC; POLYGRAM CEL300 PEI plates) (Macherey-  
210 Nagel GmbH & Co. KG, Düren, Germany) using a running buffer of [1 vol. Saturated NH<sub>4</sub>SO<sub>4</sub> (4.2 M) and 1.5  
211 volumes 1.5 M KH<sub>2</sub>PO<sub>4</sub> (pH 3.6)] (Fig. S12). Via injecting 5 μl of the reaction product, the activity of DisA was  
212 further confirmed by LC-MS (ESI-TOF mass spectrometer; Micro-TOF II, Bruker) connected to Ultimate 3000  
213 HPLC system (Dionex) on C18 column (Phenomenex, 150×4.6 mm, 110 Å, 5 μm) and using a flow rate of 0.2  
214 mL/min and a 45 min program (for 5 min, 100 % buffer A (0.1 % formic acid with 0.05% ammonium formate),  
215 then 30 min of a linear gradient to 40 % buffer B (100 % acetonitrile), and 10 min of column re-equilibration with  
216 100 % buffer A). Data are presented as extracted ion chromatograms (EICs) for ATP and c-di-AMP (Fig. S12).  
217 Finally, 250 μCi radiolabeled [<sup>32</sup>P]c-di-AMP was synthesized from [α-<sup>32</sup>P]ATP (6000 mCi/μmol) by using His<sub>6</sub>-  
218 tagged DisA by Hartmann Analytic GmbH (Braunschweig, Germany).

219  
220 **In vitro protein-ligand binding assays:** Binding of recombinantly produced ComFB to c-di-AMP was analysed  
221 *in vitro* by isothermal titration calorimetry (ITC), thermal shift assay (TSA), and differential scanning fluorimetry  
222 (nanoDSF), as described previously (Lapina et al. 2018; Haffner et al. 2023a; Mantovani et al. 2023b). For ITC  
223 and TSA, both ComFB and c-di-AMP were dissolved in binding buffer (50 mM Tris/HCl, pH 8.0, 300 mM NaCl,  
224 0.55 mM EDTA). ITC measurements were conducted on a MicroCal PEAQ-ITC instrument (Malvern  
225 Panalytical), at 25 °C, with a reference power of 10 μcal/s. Different ComFB protein concentrations in the range  
226 of 60-172 μM were titrated against 0.5 or 1 mM c-di-AMP. A control experiment was recorded by titration of c-  
227 di-AMP over a cell filled with buffer, to measure the dilution heat of c-di-AMP. Data were analyzed using one set  
228 of binding sites model with the MicroCal PEAQ-ITC Analysis Software (Malvern Panalytical) to calculate the  
229 dissociation constant K<sub>D</sub>. The dilution heat of the control ITC buffer/c-di-AMP experiments were subtracted from  
230 the ComFB/c-di-AMP runs. For reproducibility, different patches of ComFB protein purifications were used in  
231 different ITC experiments. TSA measurements were conducted on an iQ5 Real-Time PCR detection system (Bio-  
232 Rad). ComFB (10-39 μM) and 0-1.2 mM c-di-AMP were mixed in different ratios, with the addition of 10x  
233 SYPRO Orange. All conditions were measured in triplicate in sealed 96-well plates by following the dye's

234 fluorescence emission over a temperature range of 25 to 99 °C. Data were analysed with OriginPro software  
235 (OriginLab Corporation) and Python. For nanoDSF (Nanotemper), both ComFB and SbtB proteins were diluted  
236 in the ITC buffer and used at 1.5 mg/mL concentration with or without 0.5 mM c-di-AMP. The proteins  
237 autofluorescence (350/330 nm ratio), as well as light scattering were measured in a temperature range of 30-99 °C  
238 to determine the melting curve and the rate of protein unfolding.

239  
240 **Differential Radial Capillary Action of Ligand Assay (DRaCALA):** The specificity of c-di-AMP binding to  
241 ComFB has been verified using DRaCALA (Differential Radial Capillary Action of Ligand Assay) (Roelofs et al.  
242 in 2011) using either *E. coli* cell lysate or purified proteins. For cell lysate, ComFB or SbtB has been overexpressed  
243 in *E. coli* LEMO21 (DE3), and cell lysates were used for the DRaCALA assays. In the DRaCALA assays, the cell  
244 lysates (with total protein concentration of 20 µg) or purified proteins (ComFB or SbtB) were mixed with 2 nM  
245 of a radioactively labeled [<sup>32</sup>P]c-di-AMP (~ 6000 mCi/µmol) for 15 min at room temperature in a binding buffer  
246 of (10 mM Tris/HCl [pH 8.0], 100 mM NaCl and 5 mM MgCl<sub>2</sub>). In the competition binding assays, the [<sup>32</sup>P]c-di-  
247 AMP was incubated first for 2 mins with the protein or the cell lysates, before adding 1 mM of unlabeled  
248 nucleotides (c-di-AMP, c-di-GMP, ATP, ADP, and cAMP) to the reaction mixture for 15 mins. Finally, 10 µL of  
249 each mixture were dropped on a nitrocellulose membrane (Amersham™ Protan™ 0.2 µm NC, Catalogue  
250 No10600001, Cytiva Europe GmbH, Freiburg), which binds to the protein while the free ligands diffuse, thereby  
251 a radioactive signal appears at the center of the drop application in case of binding of the [<sup>32</sup>P]c-di-AMP to  
252 ComFB. After drying, the nitrocellulose membranes were transferred into an X-ray film cassette and the imaging  
253 plates (BAS-IP MS 2025, 20 x 25 cm, FUJIFILM Europe GmbH, Düsseldorf, Germany) were placed directly onto  
254 the nitrocellulose membrane, then the cassettes were closed and incubated overnight. The next day, the plates were  
255 imaged with a Typhoon™ FLA9500 PhosphorImager (GE Healthcare). For [<sup>32</sup>P]c-di-AMP signal quantification,  
256 the image analysis software Image Studio Lite Ver 5.2.5 was used. The fraction of bound nucleotide was calculated  
257 based on (Roelofs et al. 2011) using the following equation:

$$F_B = \frac{I_{\text{inner}} - \left[ A_{\text{inner}} \times \frac{(I_{\text{total}} - I_{\text{inner}})}{(A_{\text{total}} - A_{\text{inner}})} \right]}{I_{\text{total}}}$$

258  
259 In the DRaCALA competition assays, if one of the unlabeled nucleotides binds to the ComFB, it will compete on  
260 the same binding sites and will reduce or eradicate the radioactive signal of [<sup>32</sup>P]c-di-AMP binding to ComFB.  
261 SbtB, a known c-di-AMP receptor protein (Selim et al. 2021a), and extract of *E. coli* cells expressing an empty  
262 plasmid were used as positive and negative controls, respectively.

263  
264 **Phylogenetic analysis:** Phylogenetic analysis was done essentially as described elsewhere (Neumann et al. 2022).  
265 Homologous protein sequences to the ComFB full-length protein (Slr1970, amino acids 1-173) and to the ComFB-  
266 domain only (amino acids 57-147) were searched against the Ref-Seq Select proteins database, using the NCBI  
267 blastp suite. ComFB hits were filtered (expectation value  $E \leq 10^{-3}$ ). The sequences were submitted to multiple  
268 sequence alignments (MSA) using COBALT (NCBI). Phylogenetic trees were constructed based on the MSAs  
269 and visualized using the iTOL online tool (Letunic et al. 2021).

270  
271 **Construction of mutant strains:** The unicellular, freshwater cyanobacterium *Synechocystis* sp. PCC 6803,  
272 described in (Selim et al. 2021a), was used as the reference wildtype strain in this study. All plasmids and primers  
273 used in this study are listed in (Table S4). All constructs used in this study were generated using Gibson assembly.

274 All knockout mutants were generated with homolog recombination using the natural competence of *Synechocystis*  
275 sp. PCC 6803, as described previously (Selim et al. 2018).

276 For generation of knockout deletion mutants, the mutants were constructed by deleting the ORFs *slr1513*, *sll0505*,  
277 and *slr1970* (designated *sbtB*, *dacA*, and *comFB*, respectively) and replaced with the erythromycin, kanamycin,  
278 and spectinomycin resistance cassette, respectively. The  $\Delta sbtB$  and  $\Delta dacA$  knockout mutants were created, as  
279 described previously (Selim et al. 2018, 2021a). For generation of the knockout mutation in the *slr1970* ORF  
280 (designated *comFB*; Fig. S9), a synthetic DNA fragment encoding the upstream and downstream regions of  
281 *slr1970* (0.5 kb) and the spectinomycin resistant cassette (gBlock, IDT, USA) were cloned into digested pUC19  
282 vector using the Gibson cloning strategy. For complementation, the  $\Delta dacA::petE-dacA$ , WT::petE-*dacA* and  
283  $\Delta comFB::petE-comfB$  strains were generated by introducing the *dacA* gene (*sll0505*) or *comfB* gene (*slr1970*)  
284 under the control of Cu<sup>2+</sup> inducible promoter *PpetE* into respective mutant backgrounds using the self-replicating  
285 plasmid pVZ322, as described previously (Selim et al. 2018, 2021b).

286 The c-di-AMP-free mutant of *Synechococcus elongatus* PCC 7942 was created as described previously (Rubin et  
287 al. 2018) using a *cdaA*-deletion plasmid (AM5403; kindly gifted from Susan Golden) carrying the  
288 spectinomycin/streptomycin resistance gene *aadA*. All the plasmids used to generate the mutants were verified by  
289 sequencing and then transformed in *Synechocystis* sp. PCC6803, as described (Selim et al. 2018). All mutants  
290 were selected on BG<sub>11</sub> plates supplemented with proper antibiotics and verified by PCR.

291  
292 **Transformation assay:** Natural transformation competence was assessed with different suicide plasmids, all  
293 encoding chloramphenicol resistance and integrating into different places in the *Synechocystis* sp. PCC 6803  
294 genome (Oeser et al. 2021). Briefly, the cells of wildtype (WT) *Synechocystis* or respective mutants ( $\Delta dacA$ ,  
295  $\Delta sbtB$ ,  $\Delta comfB$ ,  $\Delta dacA::petE-dacA$ , WT::petE-*dacA* and  $\Delta comfB::petE-comfB$ ) were cultivated in BG<sub>11</sub> (50 mL)  
296 at 28 °C, constant 50  $\mu\text{E m}^{-2}\text{s}^{-1}$  and shaking to an OD<sub>750</sub> of 0.7, then harvested at 4,000 g for 20 min. Cell pellets  
297 were resuspended in 600  $\mu\text{l}$  of BG<sub>11</sub> and all samples were adjusted to the same OD<sub>750</sub>. Cells suspensions were  
298 transferred to a 1.5 mL tube and 1  $\mu\text{g}$  of different plasmids, containing chloramphenicol resistance cassette, were  
299 added to ensure the reproducibility. The 1.5 mL tubes were covered with aluminum foil and incubated at 28 °C  
300 for 3 h, then gently inverted and incubated for 3 more h. 0.45  $\mu\text{m}$  HATF membranes (HATF08250, Sigma-Aldrich,  
301 Germany) were placed on BG<sub>11</sub> plates and 200  $\mu\text{l}$  of the cell suspensions were spread on them. Plates were  
302 incubated at 28 °C and 50  $\mu\text{E m}^{-2}\text{s}^{-1}$  for 16 h and membranes were then transferred to BG<sub>11</sub> plates supplemented  
303 with 15  $\mu\text{g/mL}$  of chloramphenicol. After 48 h of incubation at 28 °C and 50  $\mu\text{E m}^{-2}\text{s}^{-1}$ , membranes were  
304 transferred to BG<sub>11</sub> plates supplemented with 30  $\mu\text{g/mL}$  of chloramphenicol and further incubated until singles  
305 colonies were visible. At least three-five biological replicates were used for each strain. Some clones were verified  
306 by PCR for the insertion of chloramphenicol cassette into the genome. The natural transformation competence for  
307 WT *S. elongatus* and *cdaA* mutant was done as described for *Synechocystis* but using a plasmid carrying  
308 kanamycin resistance cassette.

309  
310 **Exoproteome analysis:** *Synechocystis* sp. PCC 6803 wildtype and  $\Delta dacA$  cells were grown in 250 mL of BG<sub>11</sub>  
311 at 28 °C, constant 50  $\mu\text{E m}^{-2}\text{s}^{-1}$  and shaking to an OD<sub>750</sub> of 0.8. Cultures were spun down at 4,000 g for 20 min  
312 and the supernatant was filtered through cellulose nitrate membrane filters (7182-004, Cytiva, Marlborough,  
313 MA, USA) and concentrated to 1 mL using Amicon Ultra-15 centrifugal filters with a cutoff of 10 kDa  
314 (UFC901024, Sigma-Aldrich). Three biological replicates were prepared for each strain. Immunoblot detection



315 of PilA1 in the exoproteome extracts was done as previously described (Oeser et al. 2021) using  $\alpha$ -PilA1  
316 antibody (kindly provided by Roman Sobotka; Linhartová et al. 2014).

317  
318 **Transmission electron microscopy (TEM):** Cells (WT,  $\Delta dacA$  and WT::petE-*dacA*), growing BG<sub>11</sub> at 28°C  
319 under continuous illumination  $50 \mu\text{E m}^{-2} \text{s}^{-1}$ , were negatively stained with 2% aqueous uranyl acetate (w/v).  
320 Imaging was done with Hitachi HT7800 operated at 100 kV, equipped with an EMSIS Xarosa 20-megapixel  
321 CMOS camera (Oeser et al. 2021). Acquired images were analyzed with ImageJ.

322  
323 **Mass spectrometry-based proteomics analysis:** The full proteomics analysis of the *Synechocystis* sp. PCC 6803  
324 wildtype,  $\Delta sbtB$  and  $\Delta dacA$  cells, growing under day-night cycles, was done as described previously in (Haffner  
325 et al. 2023b). The full proteomics data sets are described in (Haffner et al. 2023b). The pulldown experiments to  
326 identify the potential c-di-AMP target proteins was done as described previously (Selim et al. 2021a) using  
327 *Synechocystis* sp. (under day and night conditions) and *Nostoc* sp. PCC 7120 cell extracts. The determination of  
328 intracellular c-di-GMP concentration in wildtype and  $\Delta dacA$  cells was done as described in (Selim et al. 2021a)  
329 using mass spectrometry calibrated with  $^{13}\text{C}_{20}^{15}\text{N}_{10}$ -c-di-GMP and  $^{13}\text{C}_{20}^{15}\text{N}_{10}$ -c-di-AMP (200 ng/ml each).

330  
331 **Data availability:** The mass spectrometry proteomics data have been deposited to the ProteomeXchange  
332 Consortium via the PRIDE partner repository with the dataset identifier PXD045008.

### 333 Acknowledgements

334  
335 The project was funded by grants from the German Research Foundation (DFG) as part of the priority research  
336 programs (SPP1879) and (SPP2389; SE 3449/1-1) to KAS and MH, and by the collaborative research center  
337 SFB1381 (project number: 403222702) to KAS, SAV and SSiv. KAS gratefully acknowledges Karl Forchhammer  
338 for continued support, and acknowledges the infrastructural support by the Cluster of Excellence “Controlling  
339 Microbes to Fight Infections (CMFI)” (EXC2124–390838134) and by the Excellence Strategy of the German  
340 Federal and Baden-Württemberg State Governments (Projektförderung: PRO-SELIM-2022-14). We would like  
341 to thank Jörg Stülke (Göttingen University), Annegret Wilde (Freiburg University), Michael Galperin (NCBI),  
342 Susan Golden (University of California San Diego) and Roman Sobotka (South Bohemia University) for valuable  
343 comments and/or sharing materials with us, and the staff of the isotope laboratory and the proteome center  
344 (Tübingen University) for their excellent support. We would like to thank also the EM facility at the Faculty of  
345 Biology, University of Freiburg, for access to the TEM. The TEM (Hitachi HT7800) was funded by the DFG grant  
346 (project number: 426849454) and is operated by University of Freiburg (Faculty of Biology) as a partner unit  
347 within the Microscopy and Image Analysis Platform (MIAP) and the Life Imaging Center (LIC). We are also  
348 grateful to Heinz Grenzendorf, Markus Burkhardt, Filipp Oesterhelt and Marina Borisova (Tübingen University),  
349 and Reinhard Albrecht (MPI for Biology Tübingen) for the excellent support and/or assistance.

### 350 Author contributions

351  
352 KAS conceived, initiated, designed and supervised the research; SSam, SD, EZ, MH, LD, TM, SPL, SSiv and  
353 KAS performed research; SVA supervised the TEM analysis; SSam, SD, EZ, and KAS analyzed data and prepared  
354 the figures; and SD and KAS wrote the manuscript. All authors approved the final version of the manuscript.

### 355 Competing interests

356  
357 The authors declare no competing interest.

358 **References**

- 359 1. Bhaya D, Bianco NR, Bryant D, Grossman A. Type IV pilus biogenesis and motility in the cyanobacterium *Synechocystis*  
360 sp. PCC6803. *Mol Microbiol.* 2000; 37(4):941-51. doi: 10.1046/j.1365-2958.2000.02068.x.
- 361 2. Carbon signaling protein SbtB possesses atypical redox-regulated apyrase activity to facilitate regulation of bicarbonate  
362 transporter SbtA. *Proc Natl Acad Sci USA.* 2023; 120(8):e2205882120. doi: 10.1073/pnas.2205882120.
- 363 3. Cengic I, Uhlén M, Hudson EP. Surface Display of Small Affinity Proteins on *Synechocystis* sp. Strain PCC 6803  
364 Mediated by Fusion to the Major Type IV Pilin PilA1. *J Bacteriol.* 2018; 200(16):e00270-18. doi: 10.1128/JB.00270-18.
- 365 4. Chang YW, Rettberg LA, Treuner-Lange A, Iwasa J, Søgaaard-Andersen L, Jensen GJ. Architecture of the type IVa pilus  
366 machine. *Science.* 2016 Mar 11;351(6278):aad2001. doi: 10.1126/science.aad2001. Epub 2016 Mar 10. Erratum in:  
367 *Science.* 2016; 352(6282). pii: aaf7977. doi: 10.1126/science.aaf7977.
- 368 5. Chen Z, Li X, Tan X, Zhang Y, Wang B. Recent Advances in Biological Functions of Thick Pili in the Cyanobacterium  
369 *Synechocystis* sp. PCC 6803. *Front Plant Sci.* 2020; 11:241. doi: 10.3389/fpls.2020.00241.
- 370 6. Conradi FD, Mullineaux CW, Wilde A. The Role of the Cyanobacterial Type IV Pilus Machinery in Finding and  
371 Maintaining a Favourable Environment. *Life (Basel).* 2020; 10(11):252. doi: 10.3390/life10110252.
- 372 7. Dienst D, Dühning U, Mollenkopf HJ, Vogel J, Golecki J, Hess WR, Wilde A. The cyanobacterial homologue of the RNA  
373 chaperone Hfq is essential for motility of *Synechocystis* sp. PCC 6803. *Microbiology (Reading).* 2008; 154(Pt 10):3134-  
374 3143. doi: 10.1099/mic.0.2008/020222-0.
- 375 8. Ellison CK, Dalia TN, Vidal Ceballos A, Wang JC, Biais N, Brun YV, Dalia AB. Retraction of DNA-bound type IV  
376 competence pili initiates DNA uptake during natural transformation in *Vibrio cholerae*. *Nat Microbiol.* 2018; 3(7):773-  
377 780. doi: 10.1038/s41564-018-0174-y.
- 378 9. Enomoto G, Wallner T, Wilde A. Control of light-dependent behaviour in cyanobacteria by the second messenger cyclic  
379 di-GMP. *MicroLife.* 2023; 4:uqad019. doi: 10.1093/femsml/uqad019.
- 380 10. Forchhammer K, Selim KA, Huergo LF. New views on PII signaling: from nitrogen sensing to global metabolic control.  
381 *Trends Microbiol.* 2022; 30(8):722-735. doi: 10.1016/j.tim.2021.12.014.
- 382 11. Gibson PS, Veening JW. Gaps in the wall: understanding cell wall biology to tackle amoxicillin resistance in  
383 *Streptococcus pneumoniae*. *Curr Opin Microbiol.* 2023; 72:102261. doi: 10.1016/j.mib.2022.102261.
- 384 12. Gonçalves CF, Pacheco CC, Tamagnini P, Oliveira P. Identification of inner membrane translocase components of TolC-  
385 mediated secretion in the cyanobacterium *Synechocystis* sp. PCC 6803. *Environ Microbiol.* 2018; 20(7):2354-2369. doi:  
386 10.1111/1462-2920.14095.
- 387 13. Haffner M, Hou W-T, Mantovani O, Walke PR, Hauf K, Borisova M, Hagemann M, Zhou C-Z, Forchhammer K, Selim  
388 KA. PII signal transduction superfamily acts as a valve plug to control bicarbonate and ammonia homeostasis among  
389 different bacterial phyla. *BioRxiv 2023a*; doi: <https://doi.org/10.1101/2023.08.10.552651>
- 390 14. Haffner M, Mantovani O, Spät P, Maček B, Hagemann M, Forchhammer K, Selim KA. Diurnal rhythm causes metabolic  
391 crises in the cyanobacterial mutants of c-di-AMP signalling cascade. *BioRxiv 2023b*; doi:  
392 <https://doi.org/10.1101/2023.11.14.567006>
- 393 15. Haft DH, Badretdin A, Coulouris G, DiCuccio M, Durkin AS, Jovenitti E, Li W, Mersha M, O'Neill KR, Virothaisakun  
394 J, Thibaud-Nissen F. RefSeq and the prokaryotic genome annotation pipeline in the age of metagenomes. *Nucleic Acids*  
395 *Res.* 2023; gkad988. doi: 10.1093/nar/gkad988.
- 396 16. Hahn J, DeSantis M, Dubnau D. Mechanisms of Transforming DNA Uptake to the Periplasm of *Bacillus subtilis*. *mBio.*  
397 2021; 12(3):e0106121. doi: 10.1128/mBio.01061-21.
- 398 17. He J, Yin W, Galperin MY, Chou SH. Cyclic di-AMP, a second messenger of primary importance: tertiary structures and  
399 binding mechanisms. *Nucleic Acids Res.* 2020; 48(6):2807-2829. doi: 10.1093/nar/gkaa112.
- 400 18. Herzberg C, Meißner J, Warneke R, Stülke J. The many roles of cyclic di-AMP to control the physiology of *Bacillus*  
401 *subtilis*. *MicroLife.* 2023; 4:uqad043. doi: 10.1093/femsml/uqad043.
- 402 19. Krol E, Werel L, Essen LO, Becker A. Structural and functional diversity of bacterial cyclic nucleotide perception by  
403 CRP proteins. *MicroLife.* 2023; 4:uqad024. doi: 10.1093/femsml/uqad024.

- 404 20. Kronborg K, Zhang YE. cAMP competitively inhibits periplasmic phosphatases to coordinate nutritional growth with  
405 competence of *Haemophilus influenzae*. J Biol Chem. 2023; 105404. doi: <https://doi.org/10.1016/j.jbc.2023.105404>
- 406 21. Lapina T, Selim KA, Forchhammer K, Ermilova E. The PII signaling protein from red algae represents an evolutionary  
407 link between cyanobacterial and Chloroplastida PII proteins. Sci Rep. 2018; 8(1):790. doi: 10.1038/s41598-017-19046-  
408 7.
- 409 22. Letunic I, Bork P. Interactive Tree Of Life (iTOL) v5: an online tool for phylogenetic tree display and annotation. Nucleic  
410 Acids Res. 2021; 49(W1):W293-W296. doi: 10.1093/nar/gkab301.
- 411 23. Linhartová M, Bučinská L, Halada P, Ječmen T, Setlík J, Komenda J, Sobotka R. Accumulation of the Type IV prepilin  
412 triggers degradation of SecY and YidC and inhibits synthesis of Photosystem II proteins in the cyanobacterium  
413 *Synechocystis* PCC 6803. Mol Microbiol. 2014; 93(6):1207-23. doi: 10.1111/mmi.12730.
- 414 24. Mantovani O, Haffner M, Selim KA, Hagemann M, Forchhammer K. Roles of second messengers in the regulation of  
415 cyanobacterial physiology: the carbon-concentrating mechanism and beyond. MicroLife. 2023a; 4:uqad008. doi:  
416 10.1093/femsml/uqad008.
- 417 25. Mantovani O, Haffner M, Walke P, Elshereef AA, Wagner B, Petras D, Forchhammer K, Selim KA, Hagemann M. The  
418 redox-sensitive R-loop of the carbon control protein SbtB contributes to the regulation of the cyanobacterial CCM.  
419 Research Square 2023b; doi: <https://doi.org/10.21203/rs.3.rs-3292191/v1>
- 420 26. Mantovani O, Reimann V, Haffner M, Herrmann FP, Selim KA, Forchhammer K, Hess WR, Hagemann M. The impact  
421 of the cyanobacterial carbon-regulator protein SbtB and of the second messengers cAMP and c-di-AMP on CO<sub>2</sub> -  
422 dependent gene expression. New Phytol. 2022; 234(5):1801-1816. doi: 10.1111/nph.18094.
- 423 27. Mehne FM, Gunka K, Eilers H, Herzberg C, Kaever V, Stülke J. Cyclic di-AMP homeostasis in *Bacillus subtilis*: both  
424 lack and high level accumulation of the nucleotide are detrimental for cell growth. J Biol Chem. 2013; 288(3):2004-17.  
425 doi: 10.1074/jbc.M112.395491.
- 426 28. Mistry J, Chuguransky S, Williams L, Qureshi M, Salazar GA, Sonnhammer ELL, Tosatto SCE, Paladin L, Raj S,  
427 Richardson LJ, Finn RD, Bateman A. Pfam: The protein families database in 2021. Nucleic Acids Res. 2021;  
428 49(D1):D412-D419. doi: 10.1093/nar/gkaa913.
- 429 29. Nelson JW, Sudarsan N, Furukawa K, Weinberg Z, Wang JX, Breaker RR. Riboswitches in eubacteria sense the second  
430 messenger c-di-AMP. Nat Chem Biol. 2013; 9(12):834-9. doi: 10.1038/nchembio.1363.
- 431 30. Neumann N, Friz S, Forchhammer K. Glucose-1,6-Bisphosphate, a Key Metabolic Regulator, Is Synthesized by a Distinct  
432 Family of  $\alpha$ -Phosphohexomutases Widely Distributed in Prokaryotes. mBio. 2022; 13(4):e0146922. doi:  
433 10.1128/mbio.01469-22.
- 434 31. Oeser S, Wallner T, Schuergers N, Bučinská L, Sivabalasarma S, Bähre H, Albers SV, Wilde A. Minor pilins are involved  
435 in motility and natural competence in the cyanobacterium *Synechocystis* sp. PCC 6803. Mol Microbiol. 2021  
436 Sep;116(3):743-765. doi: 10.1111/mmi.14768.
- 437 32. Okamoto S, Ohmori M. The cyanobacterial PilT protein responsible for cell motility and transformation hydrolyzes ATP.  
438 Plant Cell Physiol. 2002; 43(10):1127-36. doi: 10.1093/pcp/pcf128.
- 439 33. Ren A, Patel DJ. c-di-AMP binds the ydaO riboswitch in two pseudo-symmetry-related pockets. Nat Chem Biol. 2014;  
440 10(9):780-6. doi: 10.1038/nchembio.1606.
- 441 34. Roelofs KG, Wang J, Sintim HO, Lee VT. Differential radial capillary action of ligand assay for high-throughput detection  
442 of protein-metabolite interactions. Proc Natl Acad Sci USA. 2011; 108(37):15528-33. doi: 10.1073/pnas.1018949108.
- 443 35. Rubin BE, Huynh TN, Welkie DG, Diamond S, Simkovsky R, Pierce EC, Taton A, Lowe LC, Lee JJ, Rifkin SA,  
444 Woodward JJ, Golden SS. High-throughput interaction screens illuminate the role of c-di-AMP in cyanobacterial  
445 nighttime survival. PLoS Genet. 2018; 14(4):e1007301. doi: 10.1371/journal.pgen.1007301.
- 446 36. Schirmacher AM, Hanamghar SS, Zedler JAZ. Function and Benefits of Natural Competence in Cyanobacteria: From  
447 Ecology to Targeted Manipulation. Life (Basel). 2020; 10(11):249. doi: 10.3390/life10110249.

- 448 37. Schuergers N, Ruppert U, Watanabe S, Nürnberg DJ, Lochnit G, Dienst D, Mullineaux CW, Wilde A. Binding of the RNA  
449 chaperone Hfq to the type IV pilus base is crucial for its function in *Synechocystis* sp. PCC 6803. *Mol Microbiol.* 2014  
450 May;92(4):840-52. doi: 10.1111/mmi.12595.
- 451 38. Schumacher MA, Lent N, Chen VB, Salinas R. Structures of the DarR transcription regulator reveal unique modes of  
452 second messenger and DNA binding. *Nat Commun.* 2023; 14(1):7239. doi: 10.1038/s41467-023-42823-0.
- 453 39. Selim KA, Haase F, Hartmann MD, Hagemann M, Forchhammer K. P<sub>II</sub>-like signaling protein SbtB links cAMP sensing  
454 with cyanobacterial inorganic carbon response. *Proc Natl Acad Sci USA.* 2018; 115(21):E4861-E4869. doi:  
455 10.1073/pnas.1803790115.
- 456 40. Selim KA, Haffner M, Burkhardt M, Mantovani O, Neumann N, Albrecht R, Seifert R, Krüger L, Stülke J, Hartmann  
457 MD, Hagemann M, Forchhammer K. Diurnal metabolic control in cyanobacteria requires perception of second messenger  
458 signaling molecule c-di-AMP by the carbon control protein SbtB. *Sci Adv.* 2021a; 7(50):eabk0568. doi:  
459 10.1126/sciadv.abk0568.
- 460 41. Selim KA, Haffner M, Watzel B, Forchhammer K. Tuning the in vitro sensing and signaling properties of cyanobacterial  
461 PII protein by mutation of key residues. *Sci Rep.* 2019; 9(1):18985. doi: 10.1038/s41598-019-55495-y.
- 462 42. Selim KA, Lapina T, Forchhammer K, Ermilova E. Interaction of N-acetyl-l-glutamate kinase with the PII signal  
463 transducer in the non-photosynthetic alga *Polytomella parva*: Co-evolution towards a hetero-oligomeric enzyme. *FEBS*  
464 *J.* 2020; 287(3):465-482. doi: 10.1111/febs.14989.
- 465 43. Selim KA, Tremiño L, Marco-Marín C, Alva V, Espinosa J, Contreras A, Hartmann MD, Forchhammer K, Rubio V.  
466 Functional and structural characterization of PII-like protein CutA does not support involvement in heavy metal tolerance  
467 and hints at a small-molecule carrying/signaling role. *FEBS J.* 2021b; 288(4):1142-1162. doi: 10.1111/febs.15464.
- 468 44. Shyp V, Dubey BN, Böhm R, Hartl J, Nesper J, Vorholt JA, Hiller S, Schirmer T, Jenal U. Reciprocal growth control by  
469 competitive binding of nucleotide second messengers to a metabolic switch in *Caulobacter crescentus*. *Nat Microbiol.*  
470 2021; 6(1):59-72. doi: 10.1038/s41564-020-00809-4.
- 471 45. Stülke J, Krüger L. Cyclic di-AMP Signaling in Bacteria. *Annu Rev Microbiol.* 2020; 74:159-179. doi: 10.1146/annurev-  
472 micro-020518-115943.
- 473 46. Sysoeva TA, Bane LB, Xiao DY, Bose B, Chilton SS, Gaudet R, Burton BM. Structural characterization of the late  
474 competence protein ComFB from *Bacillus subtilis*. *Biosci Rep.* 2015 Mar 31;35(2):e00183. doi: 10.1042/BSR20140174.
- 475 47. Taton A, Erikson C, Yang Y, Rubin BE, Rifkin SA, Golden JW, Golden SS. The circadian clock and darkness control  
476 natural competence in cyanobacteria. *Nat Commun.* 2020; 11(1):1688. doi: 10.1038/s41467-020-15384-9.
- 477 48. Walter J, Selim KA, Leganés F, Fernández-Piñas F, Vothknecht UC, Forchhammer K, Aro EM, Gollan PJ. A novel Ca<sup>2+</sup>-  
478 binding protein influences photosynthetic electron transport in *Anabaena* sp. PCC 7120. *Biochim Biophys Acta Bioenerg.*  
479 2019; 1860(6):519-532. doi: 10.1016/j.bbabi.2019.04.007.
- 480 49. Werel L, Farmani N, Krol E, Serrania J, Essen LO, Becker A. Structural Basis of Dual Specificity of Sinorhizobium  
481 meliloti Clr, a cAMP and cGMP Receptor Protein. *mBio.* 2023; 14(2):e0302822. doi: 10.1128/mbio.03028-22.
- 482 50. Yin W, Cai X, Ma H, Zhu L, Zhang Y, Chou SH, Galperin MY, He J. A decade of research on the second messenger c-di-  
483 AMP. *FEMS Microbiol Rev.* 2020; 44(6):701-724. doi: 10.1093/femsre/fuaa019.
- 484 51. Yoon SH, Waters CM. The ever-expanding world of bacterial cyclic oligonucleotide second messengers. *Curr Opin*  
485 *Microbiol.* 2021; 60:96-103. doi: 10.1016/j.mib.2021.01.017.
- 486 52. Yoshihara S, Geng X, Okamoto S, Yura K, Murata T, Go M, Ohmori M, Ikeuchi M. Mutational analysis of genes involved  
487 in pilus structure, motility and transformation competency in the unicellular motile cyanobacterium *Synechocystis* sp.  
488 PCC 6803. *Plant Cell Physiol.* 2001; 42(1):63-73. doi: 10.1093/pcp/pee007.
- 489 53. Zarrella TM, Yang J, Metzger DW, Bai G. Bacterial Second Messenger Cyclic di-AMP Modulates the Competence State  
490 in *Streptococcus pneumoniae*. *J Bacteriol.* 2020; 202(4):e00691-19. doi: 10.1128/JB.00691-19.
- 491 54. Zeng X, Huang M, Sun QX, Peng YJ, Xu X, Tang YB, Zhang JY, Yang Y, Zhang CC. A c-di-GMP binding effector  
492 controls cell size in a cyanobacterium. *Proc Natl Acad Sci USA.* 2023; 120(13):e2221874120. doi:  
493 10.1073/pnas.2221874120.

## Figure 1

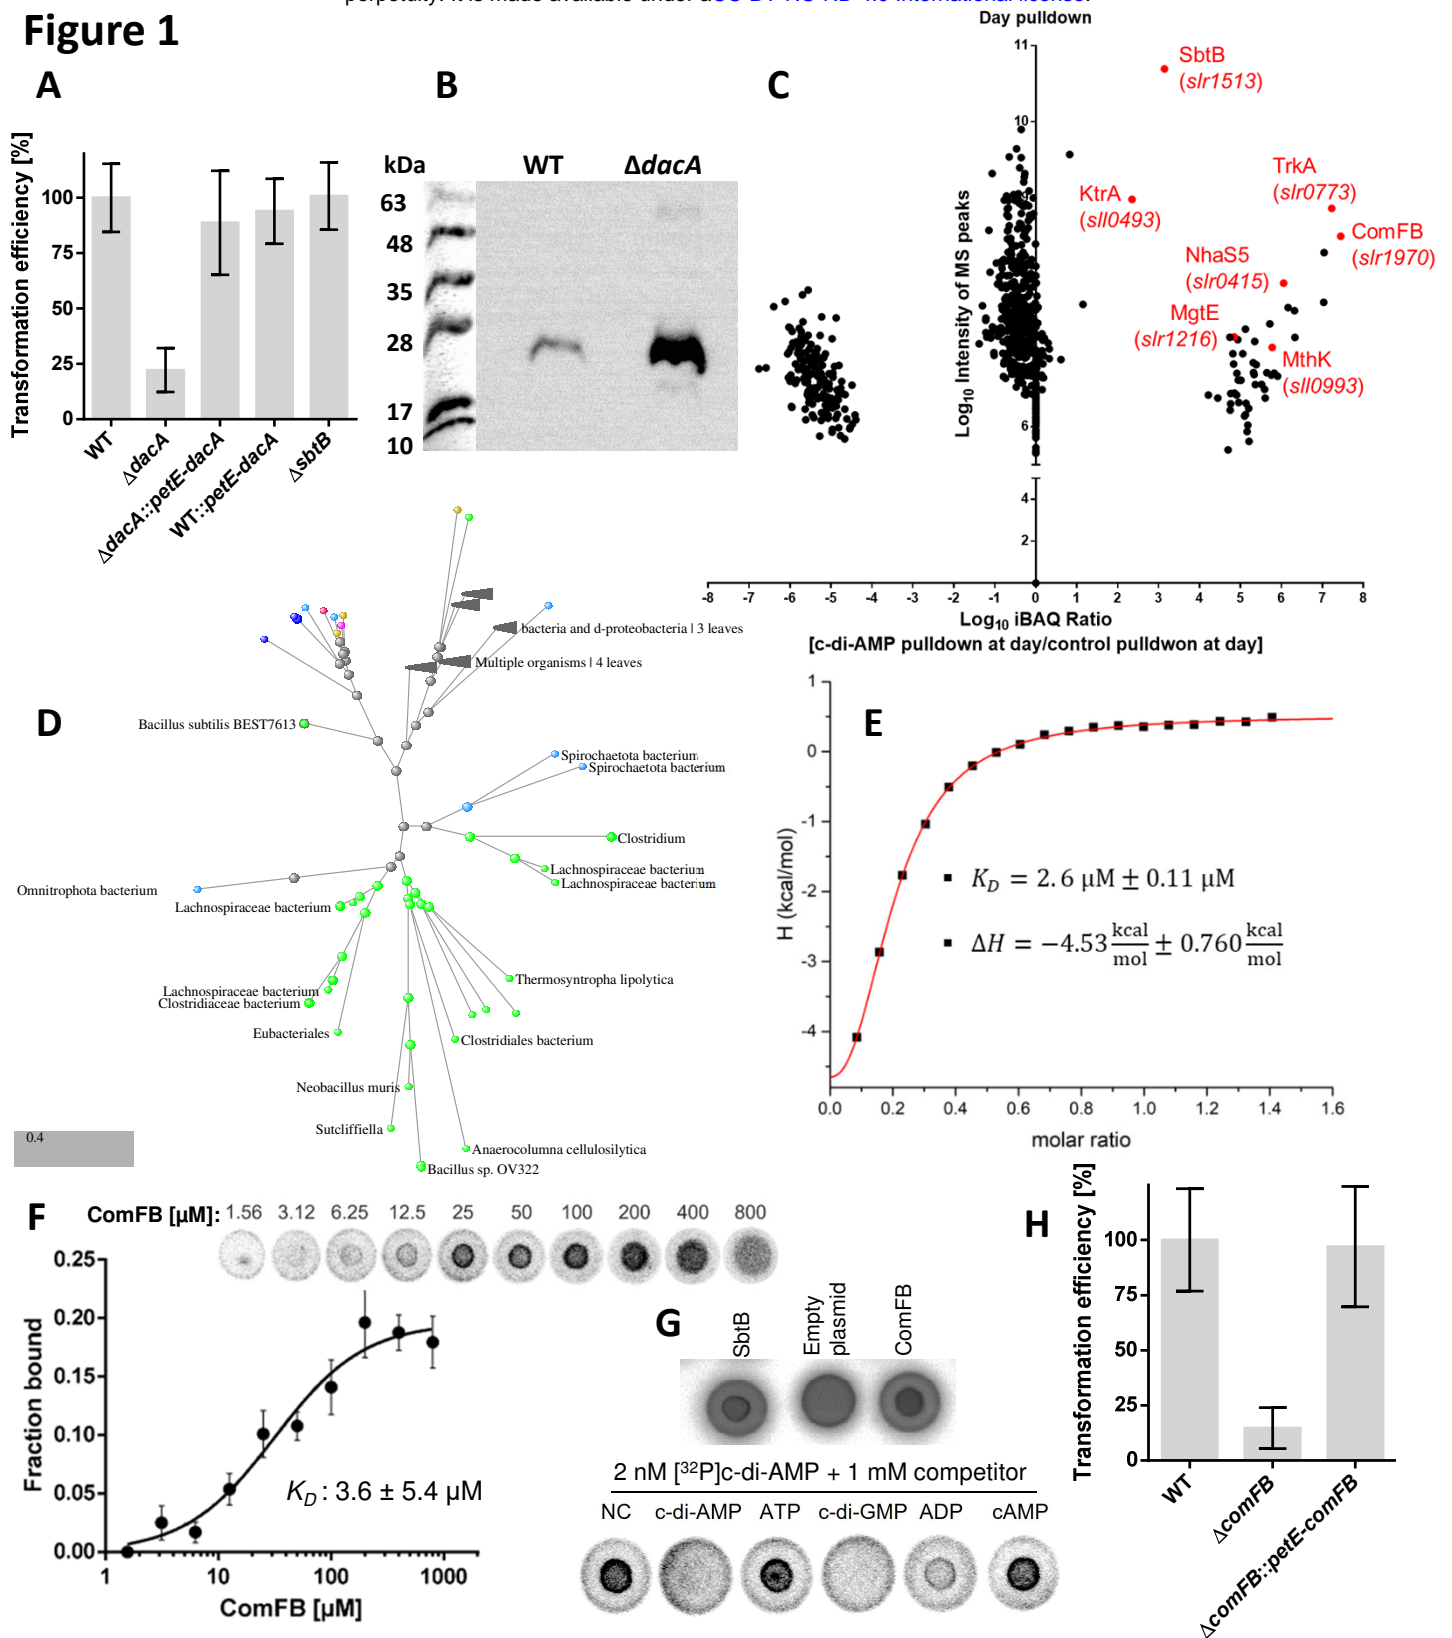

**Figure 1. Involvement of c-di-AMP in cyanobacterial natural competence via ComFB signaling protein.** (A) Transformation efficiency of WT,  $\Delta dacA$ ,  $dacA::petE-dacA$ ,  $WT::petE-dacA$  and  $\Delta sbtB$  strains. (B) Immunodetection of PiiA1 in the exoproteome of WT and  $\Delta dacA$ . (C) Pulldown experiment using immobilized c-di-AMP and extracts of *Synechocystis* cells grown under day-night cycles, showing the enriched proteins under the day phase. (D) Phylogenetic tree showing the widespread of ComFB among different bacterial phyla (detailed tree see Fig. S4). (E) Dissociation constant ( $K_D$ ) of c-di-AMP binding to ComFB and enthalpy ( $\Delta H$ ) are obtained from sigmoidal fitting curve of all ITC experiments with different monomeric ComFB concentrations (60, 72, 134 and 172  $\mu M$ ). (F) DRaCALA assay showing the binding of [ $^{32}P$ ]c-di-AMP to purified ComFB in a concentration dependent manner as indicated. The upper panel shows a representative of one replicate from four technical replicates. The lower panel shows the calculated mean  $\pm$  SD of the quantification of the bound fraction of [ $^{32}P$ ]c-di-AMP to ComFB from the four replicates and the best fitting curve with the obtained  $K_D$  value. (G) DRaCALA competition binding assay showing the competition of [ $^{32}P$ ]c-di-AMP with different nucleotides to bind ComFB. NC refers to no competitor. SbtB and cell extract of *E. coli* harboring an empty plasmid were used as positive and negative control, respectively. (H) Transformation efficiency of WT,  $\Delta comFB$ , and  $comFB::petE-comFB$  strains.

## Figure S1

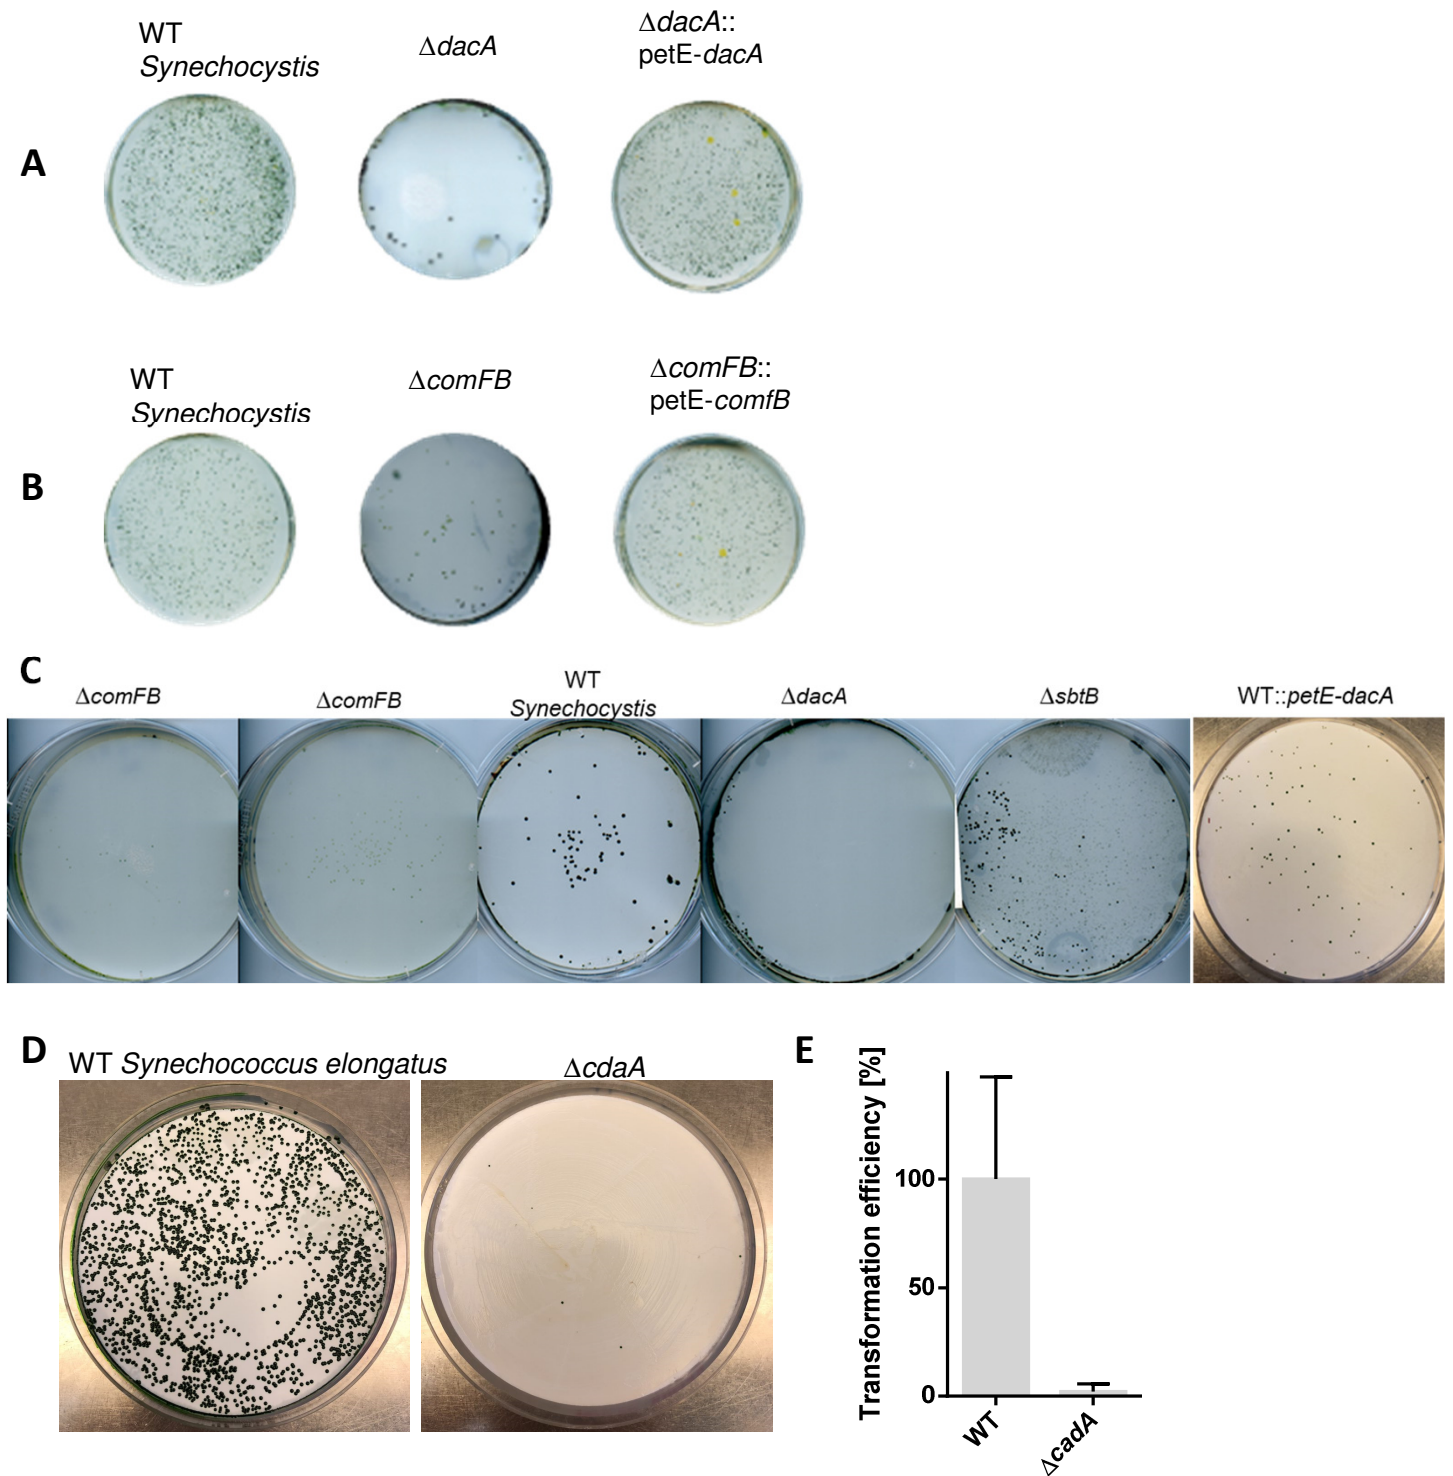

**Fig. S1:** (A-C) Representative of transformation efficiency in colony forming unites of *Synechocystis* WT,  $\Delta dacA$ , *dacA::petE-dacA*,  $\Delta comFB$ , and *comFB::petE-comFB* strains using different plasmids with chloramphenicol resistance cassette.  $\Delta sbtB$  mutant was used as a control as another c-di-AMP receptor protein. (D) Representative of transformation efficiency in colony forming unites of *Synechococcus elongatus* WT and  $\Delta cdaA$  mutant. (E) Transformation efficiency of *Synechococcus elongatus* WT and  $\Delta cdaA$  strains.

## Figure S2

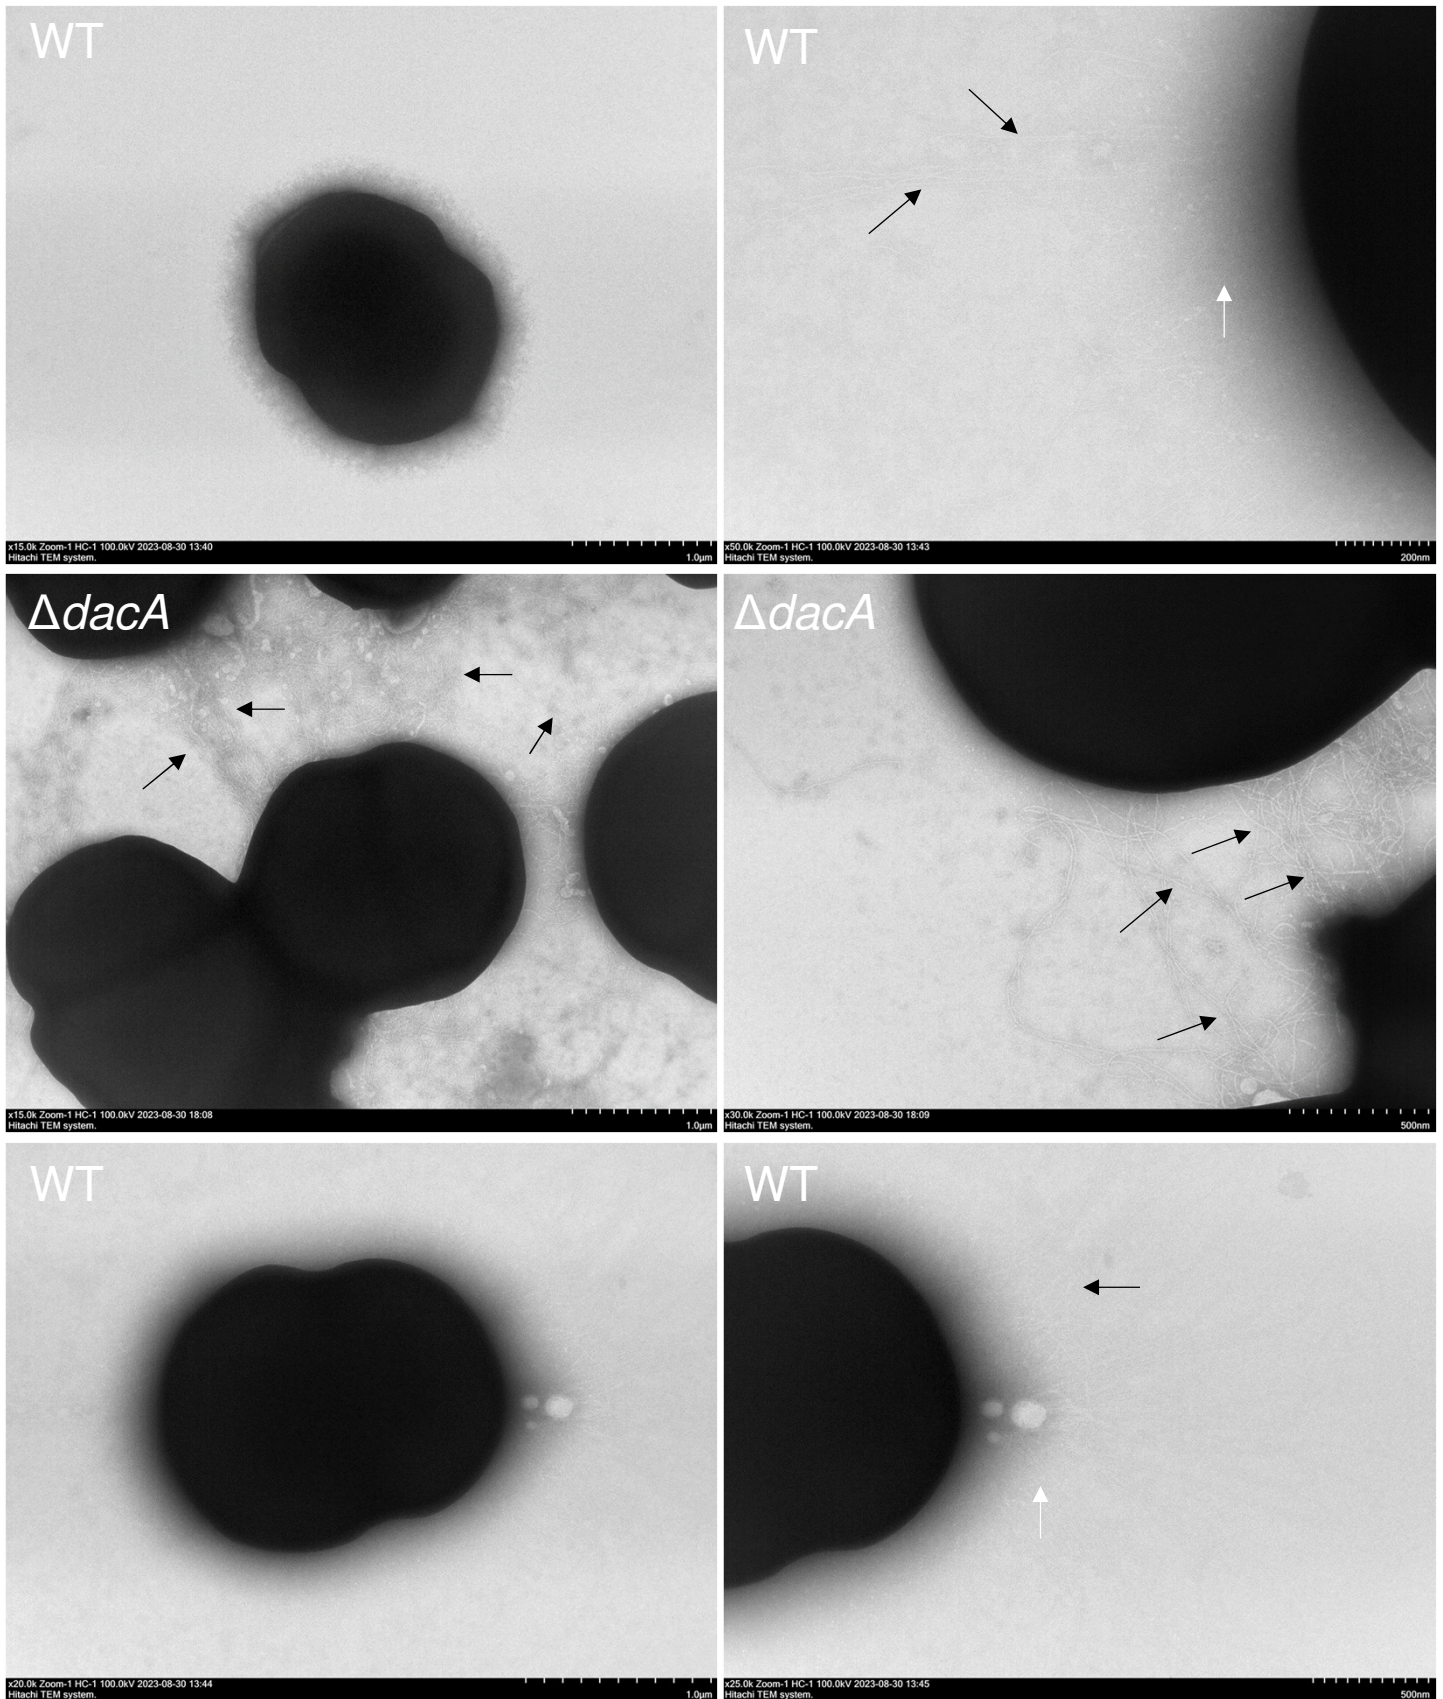

**Fig. S2:** Electron micrographs of different negatively stained *Synechocystis* and  $\Delta dacA$  mutant, as indicated strains. Whole cells are depicted with 1 µm scale bar and ultrastructural details of pili are shown in 200-500 nm with distinct types of thick pili (black arrow) and thin pili (white arrow).

## Figure S3

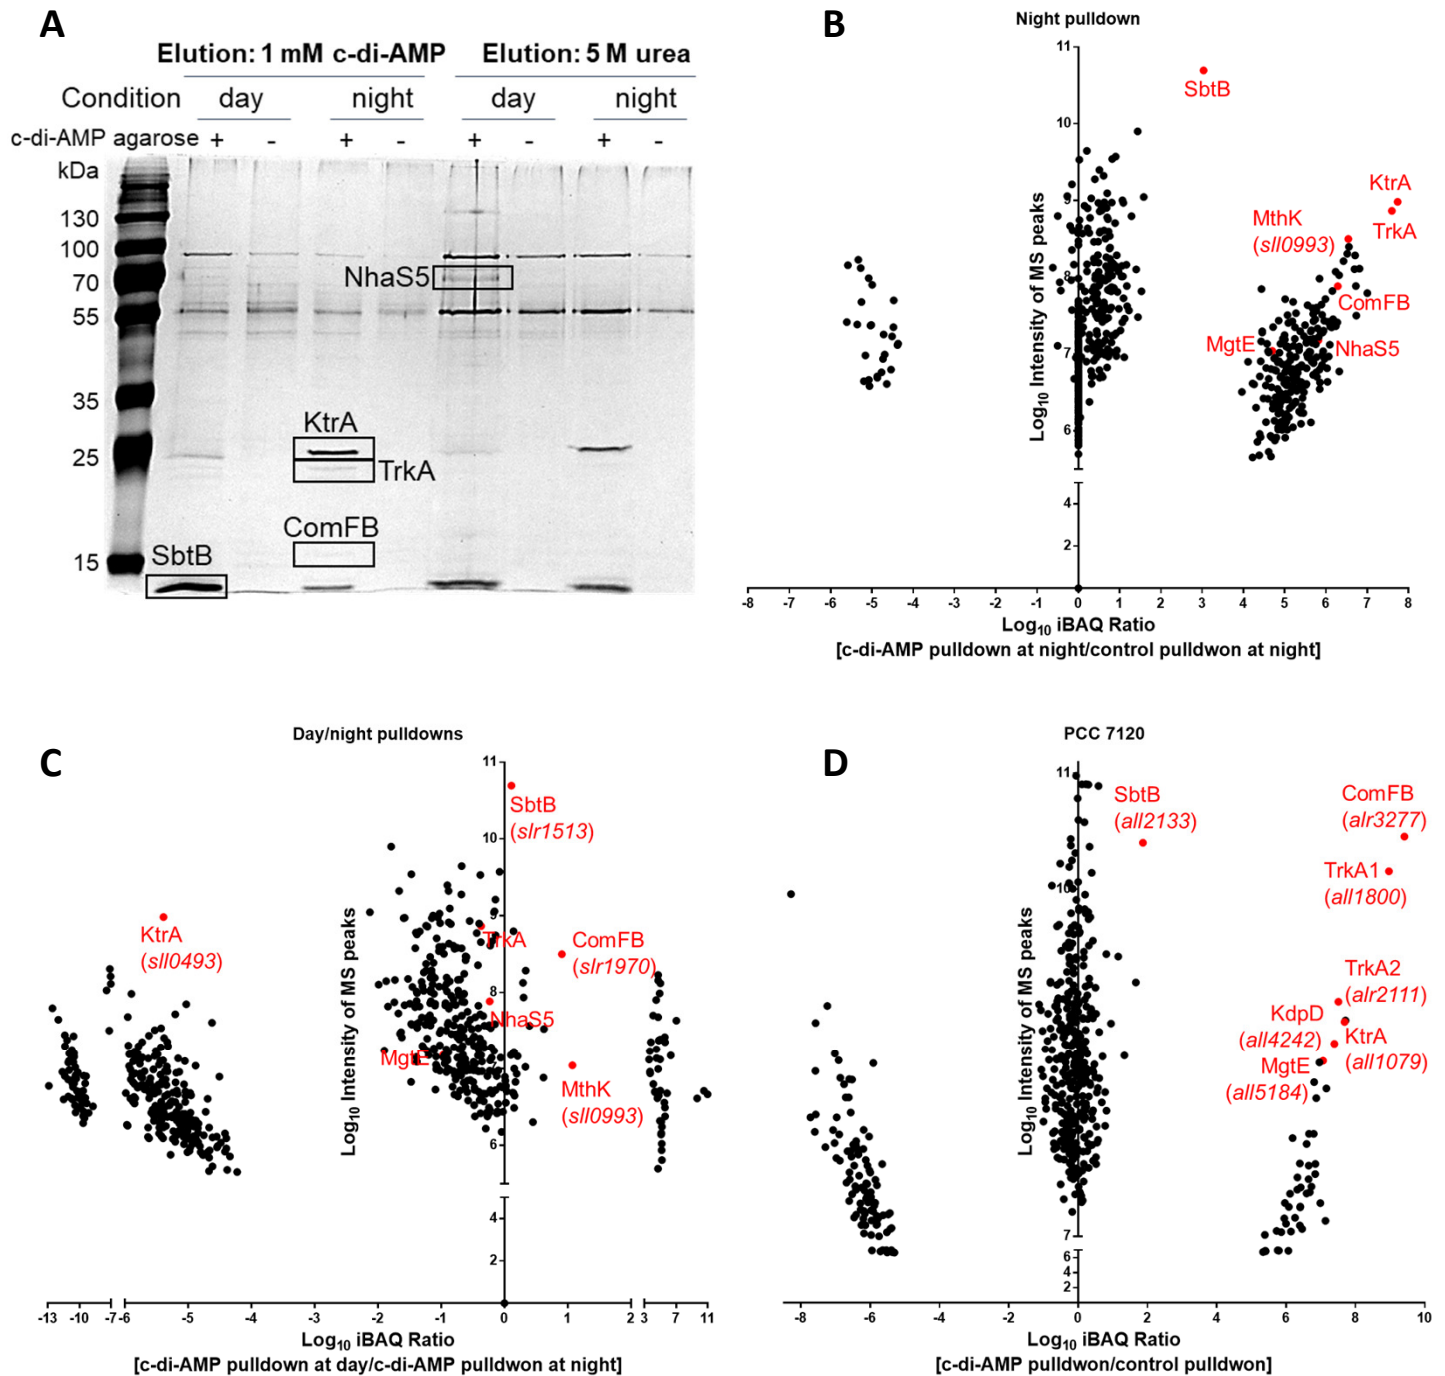

**Fig. S3: Identification of potential c-di-AMP binding proteins in *Synechocystis* sp. PCC 6803 and *Nostoc* sp. PCC 7120 using immobilized c-di-AMP pull-downs and analyzed by MS-proteomics. (A)** SDS-PAGE of c-di-AMP pull-down elution fractions in *Synechocystis* sp. PCC 6803 under day and night conditions, as indicated, with highlight of the potential targets. Elution of bound proteins was achieved by using 1 mM c-di-AMP or 5 mM urea. (B) Identification of potential c-di-AMP binding proteins in *Synechocystis* sp. PCC 6803 under night, enriched proteins are highlighted in red. (C) enrichment of ComFB in day pull-down compared to night pull-down. (D) Identification of potential c-di-AMP binding proteins in *Nostoc* sp. PCC 7120, enriched proteins are highlighted in red. (B-D) Eluates were analyzed by high accuracy LC-MS/MS to calculate protein enrichment ratios. The identified proteins were sorted by score and refined manually to remove unspecific binning proteins. Significantly enriched proteins were calculated based on Log10 of iBAQ ratio and plotted against the intensity of MS peaks of the identified/defined peptides. The known c-di-AMP receptors: SbtB, TrkA, MgtE and KtrC validated our pull-down approach in general.



## Figure S4

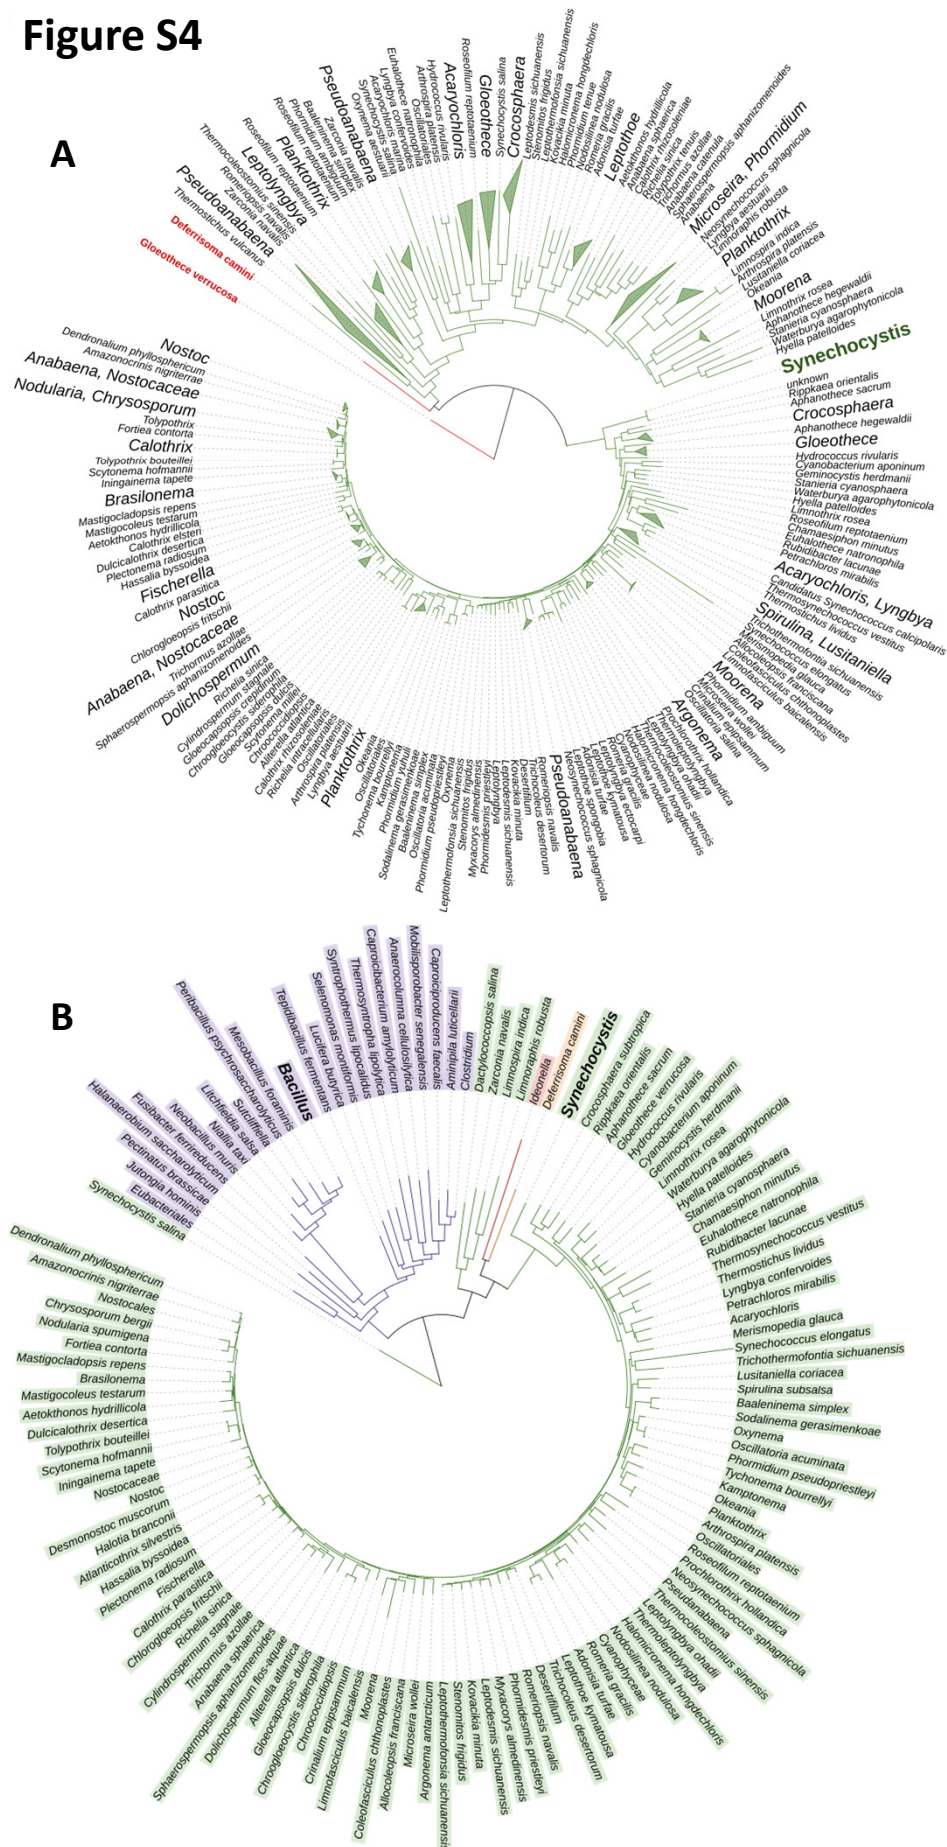

**Fig. S4: Rooted phylogenetic tree of ComFB homologs.** (A) Distribution among cyanobacteria (green). Collapsed clades are shown as triangles. (B) Distribution among cyanobacteria (green), firmicutes (violet), b-proteobacteria (red) as well as other bacteria (orange). Branch lengths represent genetic divergence. Constructed based on a multiple sequence alignment with sequences obtained from a blastp search of the ComFB domain of Slr1970.

## Figure S5

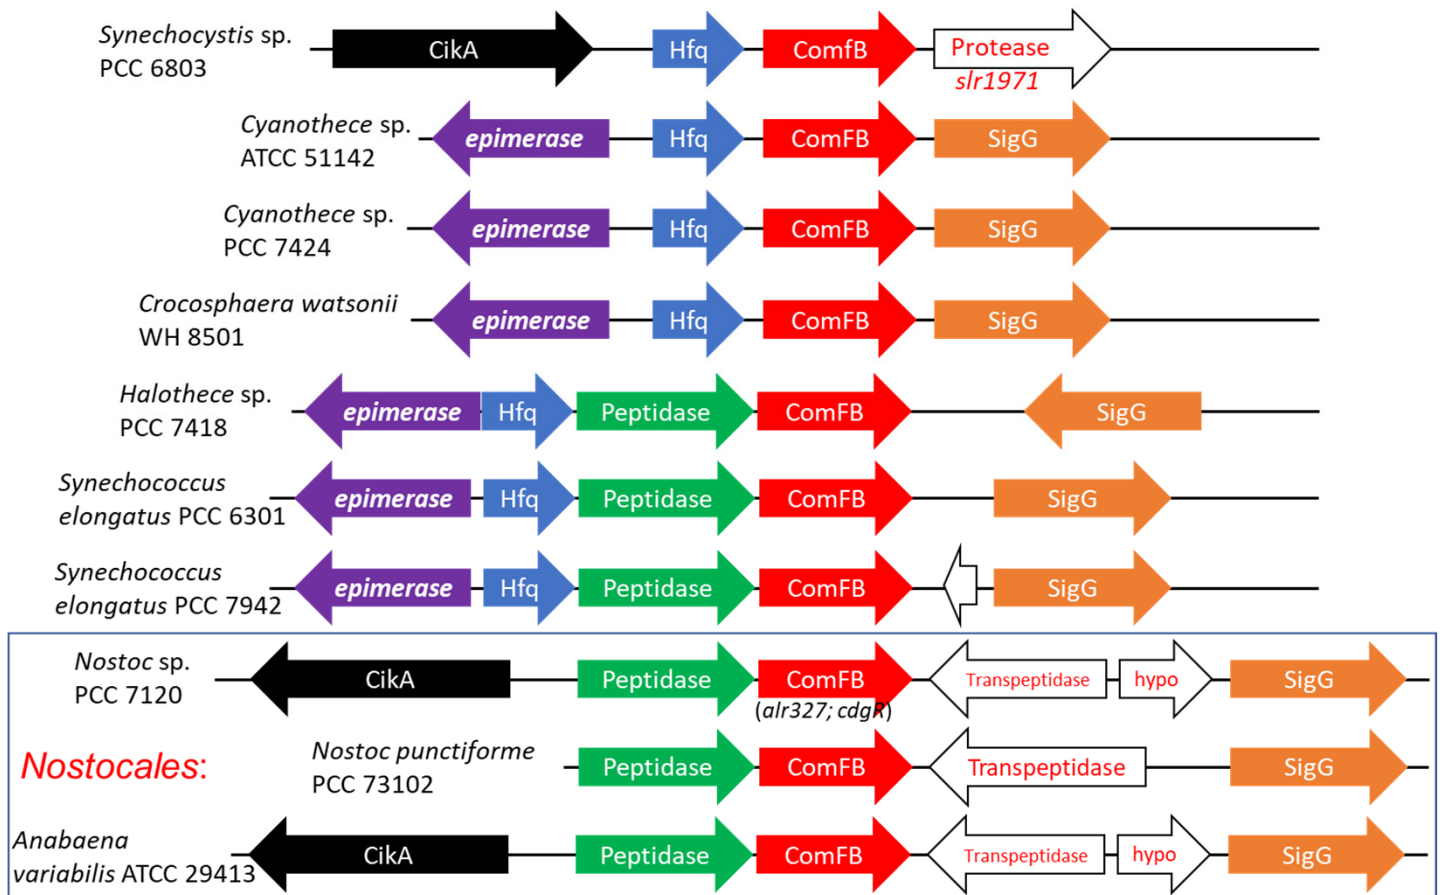

**Fig. S5: Genomic organisation and conservation of *comFB* homologs (in red) using SEED database in different cyanobacteria species, as indicated.** In *Synechocystis* sp. PCC 6803, upstream of *comFB* (*slr1970*; in red) the open reading frames of *hfq* (*ssr3341*; in blue) and *cikA* (*slr1969*; in black) are found. In other cyanobacterial species, the ORFs (open reading frames) encoding for the RNA polymerase sigma factor (SigG; in orange), putative peptidase (in green) and diaminopimelate epimerase (in violet) are found in association with *comFB* as well. Further ORFs which show no strong conservation (e.g. L,D-transpeptidase) or of hypothetical proteins (*hypo*) are coloured white.

The ORF coding for an orthologue of the RNA chaperone Hfq (*ssr3341*) is found to be conserved upstream of ComFB homologs in the unicellular cyanobacterial species, while it seems absent from the multicellular filamentous cyanobacteria of order *Nostocales*. Hfq protein is essential for phototaxis and natural competence, which depends on type IV pili (Dienst et al. 2008). Hfq regulates these processes by binding to the PilB1 ATPase subunit of pili machinery (Schuergers et al. 2014). Another conserved ORF found in association with *comFB* is *CikA* (*slr1969*; circadian input kinase A), encoding for a photoreceptor regulator of the circadian clock in cyanobacteria (Cohen & Golden 2015; Narikawa et al. 2008). The sigma factors are also involved in circadian clock regulation (Nair et al. 2002). Since ComFB is found in genomic organization with Hfq and circadian clock components, it seems logical that these proteins are also related in their function. Therefore, this further implies the involvement of ComFB in the regulation of light-dependent processes like natural competence or phototaxis (Taton et al. 2020; Menon et al. 2021), which are type IV pili dependent processes.

The ORF coding for an orthologue of the RNA chaperone Hfq (*ssr3341*) is found to be conserved upstream of ComFB homologs in the unicellular cyanobacterial species, while it seems absent from the multicellular filamentous cyanobacteria of order *Nostocales*. Hfq protein is essential for phototaxis and natural competence, which depends on type IV pili (Dienst et al. 2008). Hfq regulates these processes by binding to the PilB1 ATPase subunit of pili machinery (Schuergers et al. 2014). Another conserved ORF found in association with *comFB* is *CikA* (*slr1969*; circadian input kinase A), encoding for a photoreceptor regulator of the circadian clock in cyanobacteria (Cohen & Golden 2015; Narikawa et al. 2008). The sigma factors are also involved in circadian clock regulation (Nair et al. 2002). Since ComFB is found in genomic organization with Hfq and circadian clock components, it seems logical that these proteins are also related in their function. Therefore, this further implies the involvement of ComFB in the regulation of light-dependent processes like natural competence or phototaxis (Taton et al. 2020; Menon et al. 2021), which are type IV pili dependent processes.

## Figure S6

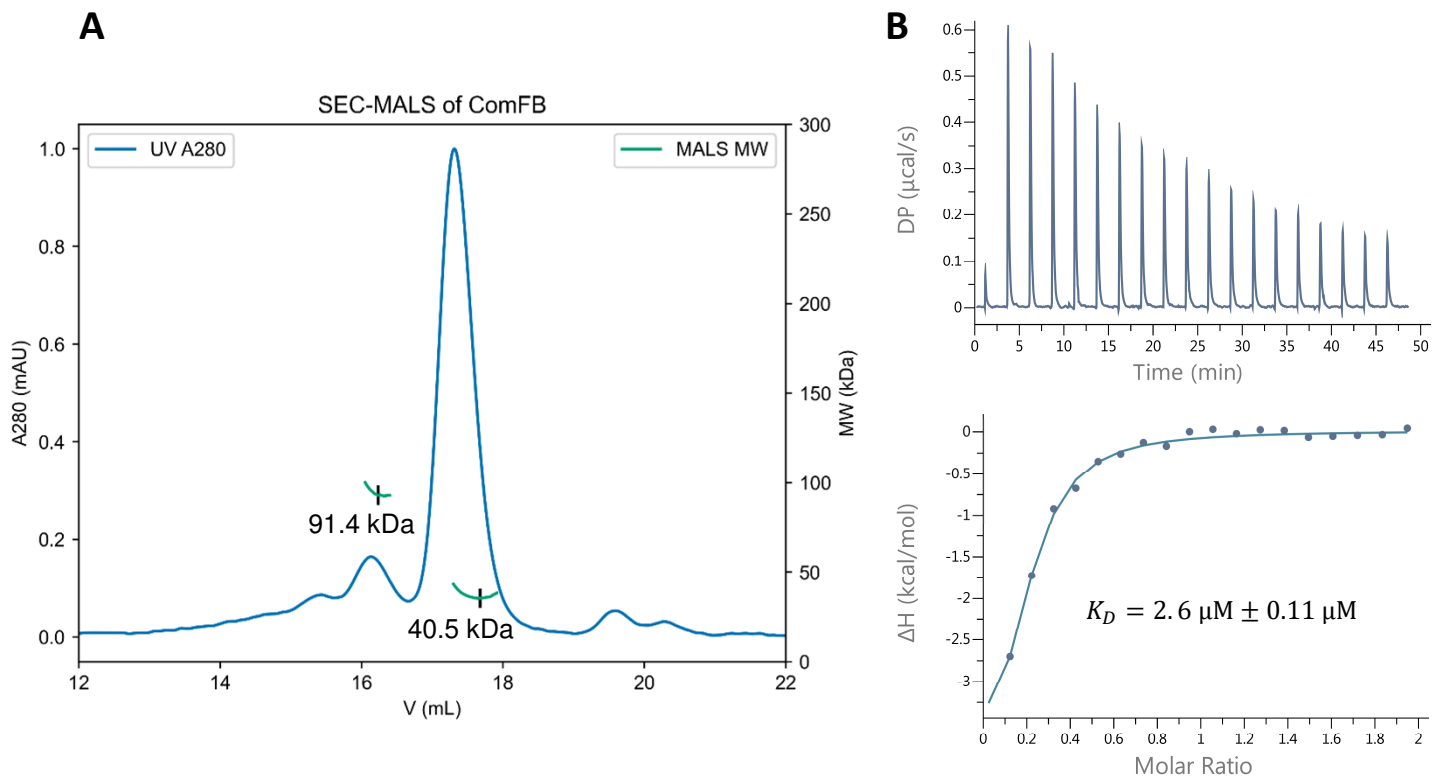

**Fig. S6: Characterization of ComFB protein encoded by *slr1970*.** (A) Size exclusion chromatography coupled to multiangle light scattering (SEC-MALS) of recombinantly purified ComFB. Absorption at 280 nm (A280) is plotted against elution volume (V) from a Superose 6 Increase 10/300 GL column. Molecular weight (MW) obtained from MALS is plotted for the two main peaks in the A280 signal, with minima in the MW marked. The major peak of ComFB (thermological mass of monomer 20.6 kDa) showed a ~ 40.5 kDa molar mass, indicating that ComFB behaves as a dimer in solution, however a small fraction of the protein behaved as a tetramer as indicated by 91. kDa molar mass. (B) Representative isothermal titration calorimetry (ITC) measurements of 172  $\mu\text{M}$  ComFB (monomeric concentration) titrated with 1 mM c-di-AMP. Upper panel shows the recorded differential power (DP) signal of ligand-to-protein titration, plotted against time. The enthalpy changes for each injected ( $\Delta H$ ) are calculated by subtraction of a differential power signal from buffer-in-protein titration control, and subsequent integration of the DP peaks, and plotted against molar ratio of ligand to protein. Lower panel shows the binding isotherms and the best-fit curves according to the one-set of binding sites for dimeric ComFB with  $K_D$  of  $2.6 \pm 0.11 \mu\text{M}$ .

## Figure S7

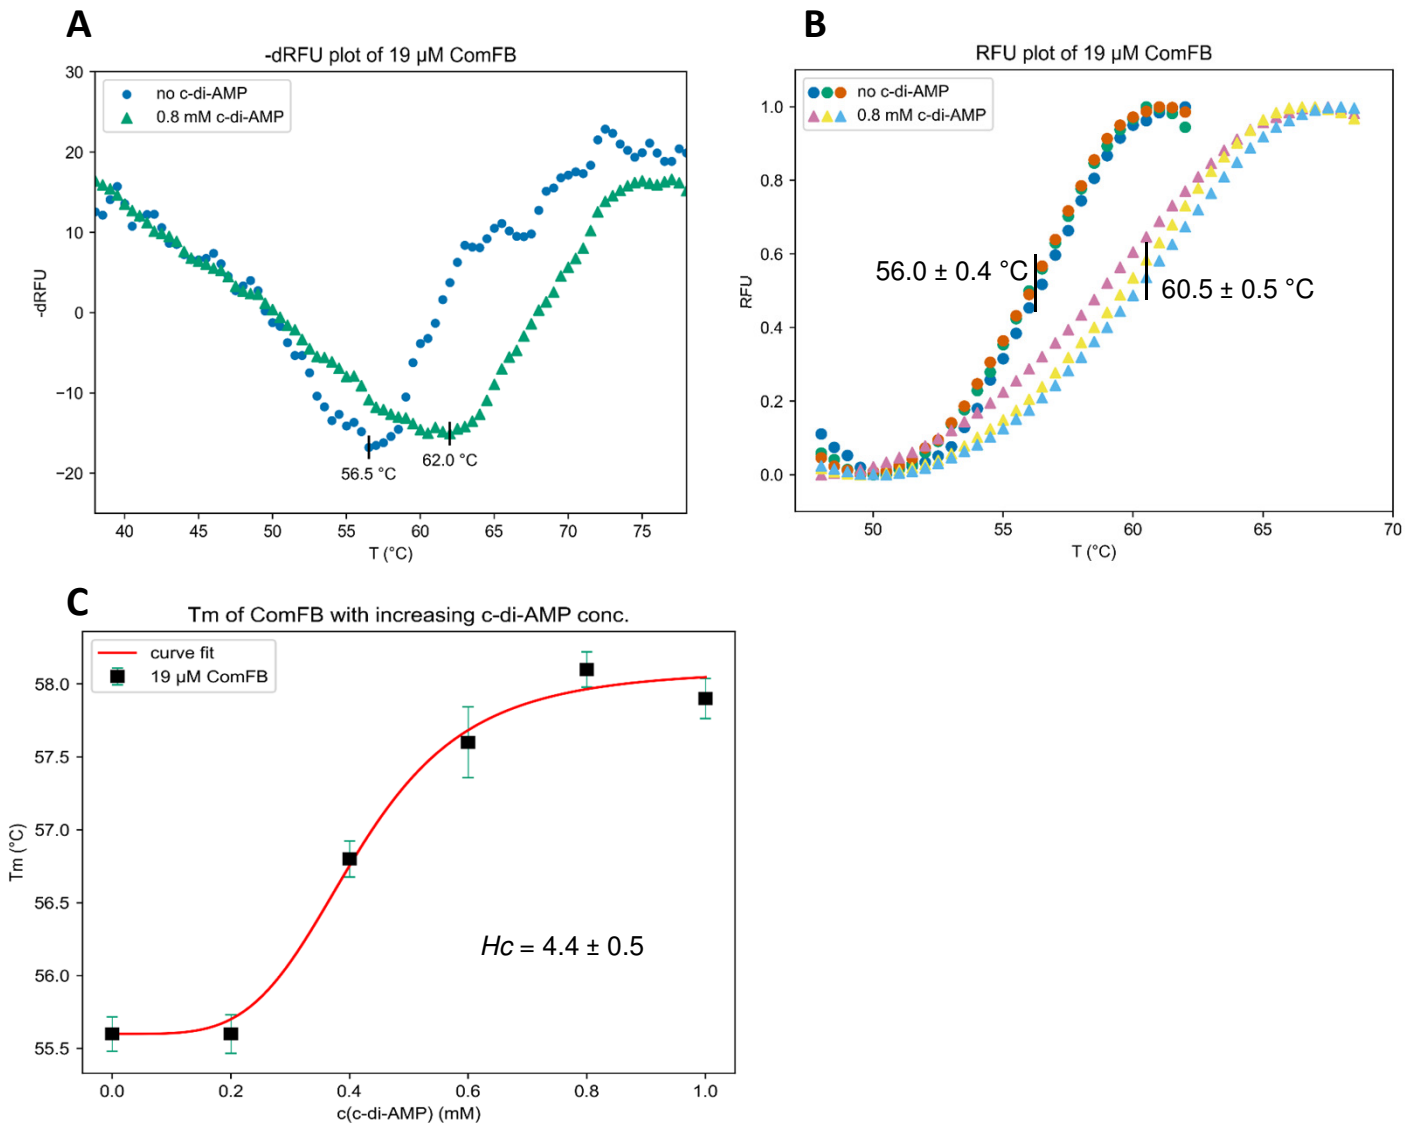

**Fig. S7: Thermal shift assay showing binding of c-di-AMP to ComFB.** (A) Negative first derivative of representative ComFB (19  $\mu\text{M}$ ) melting profiles with and without c-di-AMP (0.8 mM), calculated from thermal shift assay data. Minima in the calculated negative first derivative of recorded relative fluorescence units (-dRFU) over temperature (T) represent the melting temperatures of the protein. (B) Melting profile of 19  $\mu\text{M}$  ComFB with and without 0.8 mM c-di-AMP, recorded in a thermal shift assay. The fluorescence emission of SYPRO Orange at 570 nm was followed over a temperature range of 25-99  $^{\circ}\text{C}$ , and normalised relative fluorescence units (RFU) were plotted against temperature (T). Temperatures at half-maximal normalised fluorescence emission are indicated. Measurements were performed in triplicates. (C) Melting temperatures (T<sub>m</sub>) of 19  $\mu\text{M}$  ComFB in the presence of different concentrations of c-di-AMP; Melting temperatures were calculated from -dRFU/dT plots as in (A). Measurements were performed in triplicates, error bars show the standard deviation from the calculated mean melting temperature. The data were fitted with the Hill equation. Hill coefficient ( $H_c$ ) is in positive value, indicative of cooperativity between binding sites. Calculated values of the fitting parameters and their variance are indicated.

## Figure S8

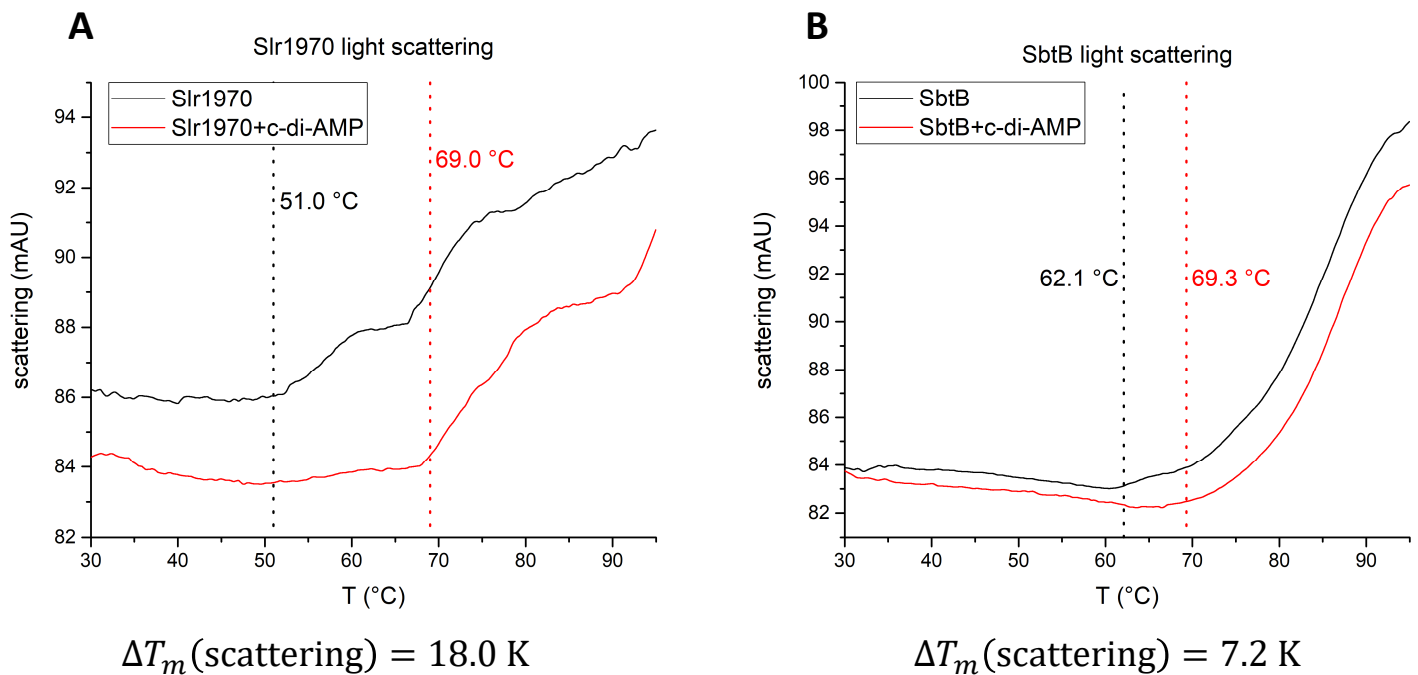

**Fig. S8: Light scattering obtained from the thermal shift assay using nanoDSF.** The calculated temperatures from which the light scattering increases are shown as indicated. The temperature shift ( $\Delta T_m$ ) between proteins (1.5 mg/ml) with and without c-di-AMP (0.5 mM) is shown as indicated. (A) Light scattering of ComFB (Slr1970), while (B) light scattering of SbtB (used as +ve control as known c-di-AMP receptor protein) (Selim et al. 2021).

## Figure S9

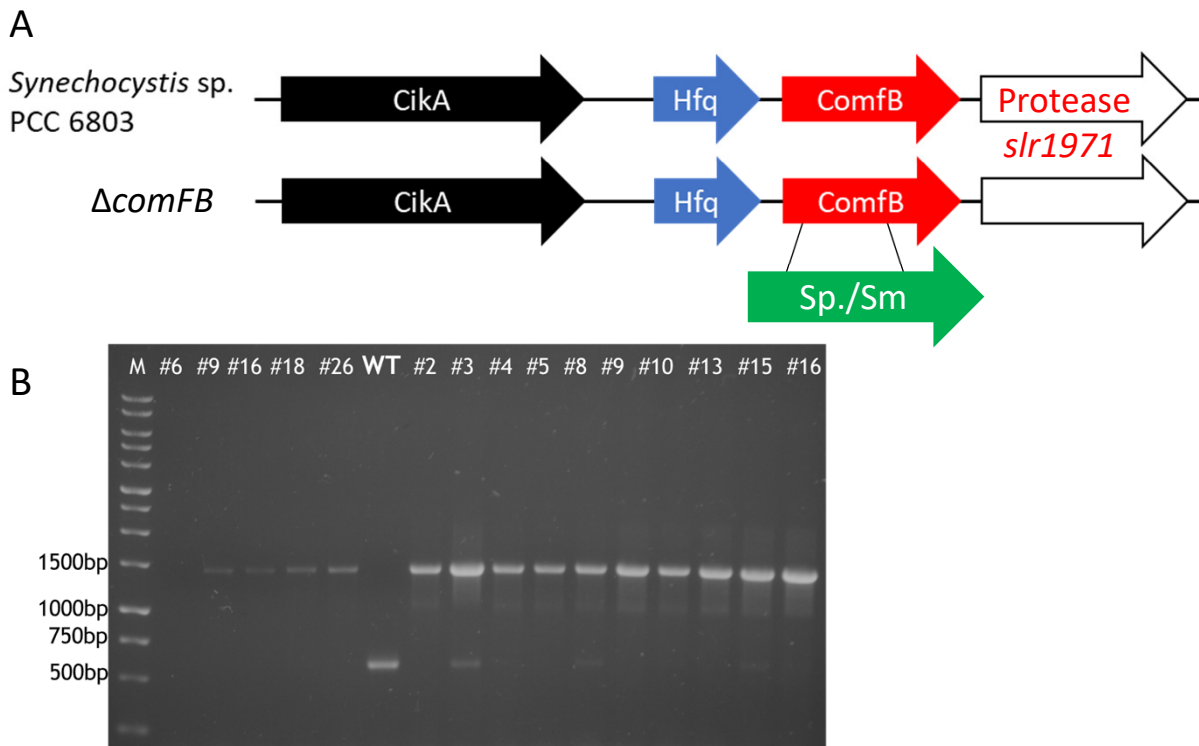

**Fig. S9: Genotypic characterization of  $\Delta comFB$  knockout mutant.** (A) Schematic representation of genetic organization of *slr1970* (designated *comFB*) gene in the *Synechocystis* sp. PCC 6803 genome, the deletions of the gene by replacement with spectinomycin/streptomycin (Sp./Sm.) resistance cassette. (B) PCR showing complete segregation of Sp./Sm-resistance-cassette  $\Delta comFB$  knockout from independent colonies (#6, #9, ..... etc). The PCR product for the wildtype (WT) and the  $\Delta comFB$  knockout is 600 bp and around 1450 bp, respectively.

## Figure S10

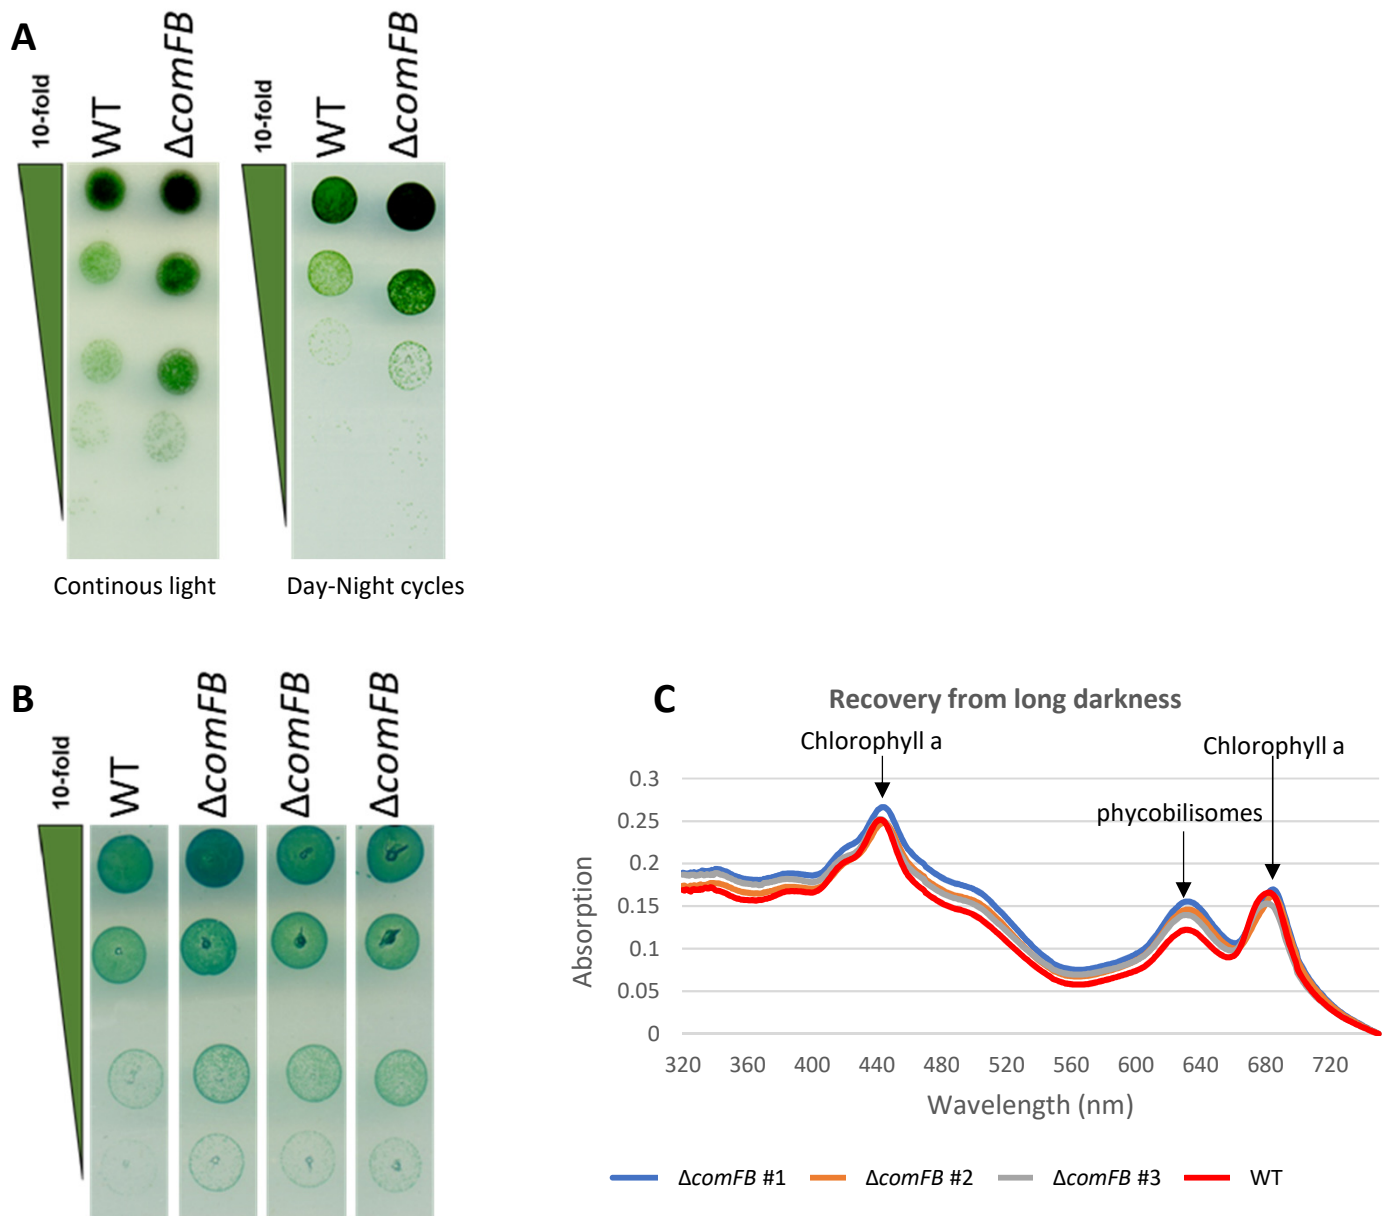

**Fig. S10: Phenotypic characterization of  $\Delta comFB$  under different light conditions.** (A) Growth test by drop plate assay of *Synechocystis* WT and  $\Delta comFB$  cells under either continuous light (left) or a 12-hour diurnal rhythm (right). (B) Viability test using the drop-plate assay of *Synechocystis* WT and  $\Delta comFB$  (3 independent clones of the mutant) cells after 6 days of incubation in complete darkness. Cells were normalized to an optical density at 750 nm ( $OD_{750}$ ) of 1.0 and serially diluted in 10-fold steps (top to bottom; depicted by a green triangle). (C) Whole cell spectra of *Synechocystis* WT cells in comparison to  $\Delta comFB$  cells after 2 days of recovery from darkness (6 days). The peak representing phycobilisomes as well as the peaks representing chlorophyll a are depicted by black arrows. Cultures were normalized to similar  $OD_{750}$ .

## Figure S11

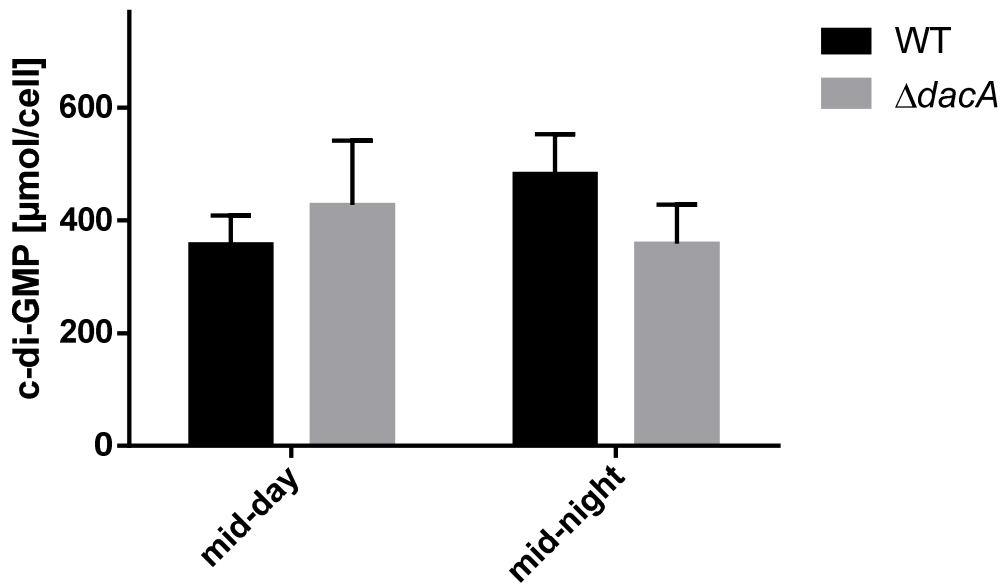

**Fig. S11:** c-di-GMP concentration throughout a 12 h diurnal rhythm within *Synechocystis* WT (black bars) and  $\Delta dacA$  cells (gray bars) at either mid of day or night phase (i.e. 6 h of light or darkness). X-axis shows the time in hours; Y-axis shows the intracellular concentrations of c-di-GMP.



## Figure S12

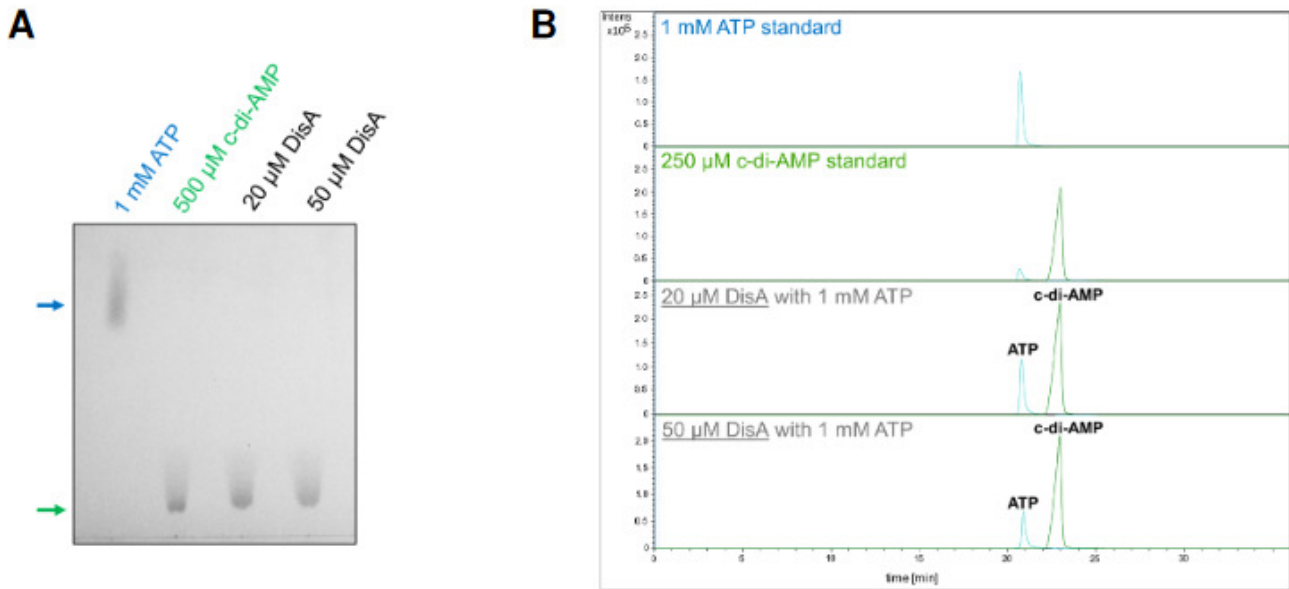

**Fig. S12: Synthesis of c-di-AMP from purified DisA. Analysis of the enzymatic conversion of 1 mM ATP to c-di-AMP with 20  $\mu$ M or 50  $\mu$ M recombinant DisA.** (A) Thin layer chromatography (TLC). Arrows denote running distance of c-di-AMP (green) and ATP (blue). (B) LC-MS analysis of purified His<sub>6</sub>-tagged DisA showing conversion of ATP to c-di-AMP.

### Supporting materials references:

- Cohen SE, Golden SS. Circadian Rhythms in Cyanobacteria. *Microbiol Mol Biol Rev.* 2015; 79(4):373-85. doi: 10.1128/MMBR.00036-15.
- Dienst D, Dühning U, Mollenkopf HJ, Vogel J, Golecki J, Hess WR, Wilde A. The cyanobacterial homologue of the RNA chaperone Hfq is essential for motility of *Synechocystis* sp. PCC 6803. *Microbiology (Reading).* 2008; 154(Pt 10):3134-3143. doi: 10.1099/mic.0.2008/020222-0.
- Menon SN, Varuni P, Bunbury F, Bhaya D, Menon GI. Phototaxis in Cyanobacteria: From Mutants to Models of Collective Behavior. *mBio.* 2021; 12(6):e0239821. doi: 10.1128/mBio.02398-21.
- Nair U, Ditty JL, Min H, Golden SS. Roles for sigma factors in global circadian regulation of the cyanobacterial genome. *J Bacteriol.* 2002; 184(13):3530-8. doi: 10.1128/JB.184.13.3530-3538.2002.
- Narikawa R, Kohchi T, Ikeuchi M. Characterization of the photoactive GAF domain of the CikA homolog (SyCikA, Slr1969) of the cyanobacterium *Synechocystis* sp. PCC 6803. *Photochem Photobiol Sci.* 2008; 7(10):1253-9. doi: 10.1039/b811214b.
- Schuergers N, Ruppert U, Watanabe S, Nürnberg DJ, Lochnit G, Dienst D, Mullineaux CW, Wilde A. Binding of the RNA chaperone Hfq to the type IV pilus base is crucial for its function in *Synechocystis* sp. PCC 6803. *Mol Microbiol.* 2014; 92(4):840-52. doi: 10.1111/mmi.12595.
- Selim KA, Haffner M, Burkhardt M, Mantovani O, Neumann N, Albrecht R, Seifert R, Krüger L, Stülke J, Hartmann MD, Hagemann M, Forchhammer K. Diurnal metabolic control in cyanobacteria requires perception of second messenger signaling molecule c-di-AMP by the carbon control protein SbtB. *Sci Adv.* 2021; 7(50):eabk0568. doi: 10.1126/sciadv.abk0568.
- Taton A, Erikson C, Yang Y, Rubin BE, Rifkin SA, Golden JW, Golden SS. The circadian clock and darkness control natural competence in cyanobacteria. *Nat Commun.* 2020; 11(1):1688. doi: 10.1038/s41467-020-15384-9.
